# Supplementary material for: The Stability of a Mixed-Phase Barium Cerium Iron Oxide under Reducing Conditions in the Presence of Hydrogen
Source: MDPI journal article supplement (doi:10.3390/molecules28031429), 2023-02-02
Supplement: s1 [file s1]

# The Stability of a Mixed-Phase Barium Cerium Iron Oxide Under Reducing Conditions in the Presence of Hydrogen: Supporting Information

Benjamin Rosen and Karl Sohlberg

**Note:** All lattice vectors are given in Å and all coordinates are fractional.

## S1: Bulk Structures

### S1.1: Orthorhombic BCF8515 Bulk

K-point grid: 2 1 2

40 ions

0.2234495703708639 0.1970684556695197 -6.1458158332299071  
-0.2034790132121650 -12.2742320515120191 -0.3812088266999936  
-8.7134635578786970 0.1928833305212641 -0.3010128344501486

|    |             |            |             |
|----|-------------|------------|-------------|
| Ba | 0.49680396  | 0.47767887 | 0.26094688  |
| Ba | 0.00490182  | 0.25289991 | 0.73301291  |
| Ba | 0.99093720  | 0.76207261 | 0.74766957  |
| Ba | 0.50319604  | 0.02232113 | 0.73905312  |
| Ba | 0.50378433  | 0.49098395 | 0.73207619  |
| Ba | -0.00490182 | 0.24710009 | 0.26698709  |
| Ba | 0.00906280  | 0.73792739 | 0.25233043  |
| Ba | 0.49621567  | 0.00901605 | 0.26792381  |
| Ce | 0.50000000  | 0.25000000 | 0.00000000  |
| Ce | 0.50000000  | 0.75000000 | 0.00000000  |
| Ce | -0.00246486 | 0.00958631 | 0.50028857  |
| Ce | 0.00246486  | 0.49041369 | 0.49971143  |
| Ce | -0.00184414 | 0.00061469 | -0.00033538 |
| Ce | 0.00184414  | 0.49938531 | 0.00033538  |
| Ce | 0.50000000  | 0.75000000 | 0.50000000  |
| O  | 0.73798956  | 0.88650626 | 0.54331506  |
| O  | 0.93348309  | 0.49452305 | 0.25249159  |
| O  | 0.28793317  | 0.60450016 | 0.04989908  |
| O  | 0.30071173  | 0.10270685 | 0.02444542  |
| O  | 0.23402839  | 0.87419294 | 0.46371046  |
| O  | 0.27150096  | 0.35975727 | 0.48041772  |
| O  | 0.79855651  | 0.64743177 | 0.96915993  |

|    |            |            |            |
|----|------------|------------|------------|
| O  | 0.72851864 | 0.36256392 | 0.51598615 |
| O  | 0.57728507 | 0.76584389 | 0.25164412 |
| O  | 0.53712361 | 0.24755034 | 0.27546330 |
| O  | 0.46287639 | 0.25244966 | 0.72453670 |
| O  | 0.06455806 | 0.48346857 | 0.74892888 |
| O  | 0.71206683 | 0.89549984 | 0.95010092 |
| O  | 0.69928827 | 0.39729315 | 0.97555458 |
| O  | 0.76597161 | 0.62580706 | 0.53628954 |
| O  | 0.72849904 | 0.14024273 | 0.51958228 |
| O  | 0.26201044 | 0.61349374 | 0.45668494 |
| O  | 0.06651691 | 0.00547695 | 0.74750841 |
| O  | 0.93544194 | 0.01653143 | 0.25107112 |
| O  | 0.20802011 | 0.35050886 | 0.03484639 |
| O  | 0.20144349 | 0.85256823 | 0.03084007 |
| O  | 0.27148136 | 0.13743608 | 0.48401385 |
| O  | 0.79197989 | 0.14949114 | 0.96515361 |
| O  | 0.42271493 | 0.73415611 | 0.74835588 |
| Fe | 0.50000000 | 0.25000000 | 0.50000000 |

## S1.2: Cubic BCF8515

K-point grid: 2 2 2

40 ions

```

8.7297543768165795  0.0000000000000000  0.0000000000000000
0.0000000000000000 -8.7297543768165795  0.0000000000000000
0.0000000000000000  0.0000000000000000 -8.7297543768165795

```

|    |            |            |            |
|----|------------|------------|------------|
| Ba | 0.26115529 | 0.26115529 | 0.26115529 |
| Ba | 0.26115529 | 0.26115529 | 0.73884471 |
| Ba | 0.26115529 | 0.73884471 | 0.26115529 |
| Ba | 0.26115529 | 0.73884471 | 0.73884471 |
| Ba | 0.73884471 | 0.26115529 | 0.26115529 |
| Ba | 0.73884471 | 0.26115529 | 0.73884471 |
| Ba | 0.73884471 | 0.73884471 | 0.26115529 |
| Ba | 0.73884471 | 0.73884471 | 0.73884471 |
| Ce | 0.00000000 | 0.00000000 | 0.00000000 |
| Ce | 0.00000000 | 0.00000000 | 0.50000000 |
| Ce | 0.00000000 | 0.50000000 | 0.00000000 |
| Ce | 0.00000000 | 0.50000000 | 0.50000000 |
| Ce | 0.50000000 | 0.00000000 | 0.00000000 |
| Ce | 0.50000000 | 0.00000000 | 0.50000000 |

|    |            |            |            |
|----|------------|------------|------------|
| Ce | 0.50000000 | 0.50000000 | 0.00000000 |
| Fe | 0.50000000 | 0.50000000 | 0.50000000 |
| O  | 0.00000000 | 0.25274566 | 0.00000000 |
| O  | 0.00000000 | 0.25366674 | 0.50000000 |
| O  | 0.00000000 | 0.74725434 | 0.00000000 |
| O  | 0.00000000 | 0.74633326 | 0.50000000 |
| O  | 0.50000000 | 0.25366674 | 0.00000000 |
| O  | 0.50000000 | 0.27406529 | 0.50000000 |
| O  | 0.50000000 | 0.74633326 | 0.00000000 |
| O  | 0.50000000 | 0.72593471 | 0.50000000 |
| O  | 0.00000000 | 0.00000000 | 0.25274566 |
| O  | 0.00000000 | 0.00000000 | 0.74725434 |
| O  | 0.00000000 | 0.50000000 | 0.25366674 |
| O  | 0.00000000 | 0.50000000 | 0.74633326 |
| O  | 0.50000000 | 0.00000000 | 0.25366674 |
| O  | 0.50000000 | 0.00000000 | 0.74633326 |
| O  | 0.50000000 | 0.50000000 | 0.27406529 |
| O  | 0.50000000 | 0.50000000 | 0.72593471 |
| O  | 0.25274566 | 0.00000000 | 0.00000000 |
| O  | 0.25366674 | 0.00000000 | 0.50000000 |
| O  | 0.25366674 | 0.50000000 | 0.00000000 |
| O  | 0.27406529 | 0.50000000 | 0.50000000 |
| O  | 0.74725434 | 0.00000000 | 0.00000000 |
| O  | 0.74633326 | 0.00000000 | 0.50000000 |
| O  | 0.74633326 | 0.50000000 | 0.00000000 |
| O  | 0.72593471 | 0.50000000 | 0.50000000 |

### S1.3: BCF1585

K-point grid: 2 2 2

40 ions

|                    |                    |                    |
|--------------------|--------------------|--------------------|
| 7.9773790556525919 | 0.0000000000000000 | 0.0000000000000000 |
| 0.0000000000000000 | 7.9773790556525928 | 0.0000000000000000 |
| 0.0000000000000000 | 0.0000000000000000 | 7.9773790556525928 |

|    |             |             |             |
|----|-------------|-------------|-------------|
| Ba | 0.244045258 | 0.244045258 | 0.244045258 |
| Ba | 0.24404526  | 0.24404526  | 0.75595474  |
| Ba | 0.24404526  | 0.75595474  | 0.24404526  |
| Ba | 0.24404526  | 0.75595474  | 0.75595474  |
| Ba | 0.75595474  | 0.24404526  | 0.24404526  |
| Ba | 0.75595474  | 0.24404526  | 0.75595474  |
| Ba | 0.75595474  | 0.75595474  | 0.24404526  |

|    |            |            |            |
|----|------------|------------|------------|
| Ba | 0.75595474 | 0.75595474 | 0.75595474 |
| Fe | 0.00000000 | 0.00000000 | 0.00000000 |
| Fe | 0.00000000 | 0.00000000 | 0.50000000 |
| Fe | 0.00000000 | 0.50000000 | 0.00000000 |
| Fe | 0.00000000 | 0.50000000 | 0.50000000 |
| Fe | 0.50000000 | 0.00000000 | 0.00000000 |
| Fe | 0.50000000 | 0.00000000 | 0.50000000 |
| Fe | 0.50000000 | 0.50000000 | 0.00000000 |
| Ce | 0.50000000 | 0.50000000 | 0.50000000 |
| O  | 0.00000000 | 0.24791919 | 0.00000000 |
| O  | 0.00000000 | 0.24731434 | 0.50000000 |
| O  | 0.00000000 | 0.75208081 | 0.00000000 |
| O  | 0.00000000 | 0.75268566 | 0.50000000 |
| O  | 0.50000000 | 0.24731434 | 0.00000000 |
| O  | 0.50000000 | 0.22794956 | 0.50000000 |
| O  | 0.50000000 | 0.75268566 | 0.00000000 |
| O  | 0.50000000 | 0.77205044 | 0.50000000 |
| O  | 0.00000000 | 0.00000000 | 0.24791919 |
| O  | 0.00000000 | 0.00000000 | 0.75208081 |
| O  | 0.00000000 | 0.50000000 | 0.24731434 |
| O  | 0.00000000 | 0.50000000 | 0.75268566 |
| O  | 0.50000000 | 0.00000000 | 0.24731434 |
| O  | 0.50000000 | 0.00000000 | 0.75268566 |
| O  | 0.50000000 | 0.50000000 | 0.22794956 |
| O  | 0.50000000 | 0.50000000 | 0.77205044 |
| O  | 0.24791919 | 0.00000000 | 0.00000000 |
| O  | 0.24731434 | 0.00000000 | 0.50000000 |
| O  | 0.24731434 | 0.50000000 | 0.00000000 |
| O  | 0.22794956 | 0.50000000 | 0.50000000 |
| O  | 0.75208081 | 0.00000000 | 0.00000000 |
| O  | 0.75268566 | 0.00000000 | 0.50000000 |
| O  | 0.75268566 | 0.50000000 | 0.00000000 |
| O  | 0.77205044 | 0.50000000 | 0.50000000 |

## S2: Orthorhombic BCF8515 slabs

### S2.1: No oxygen vacancies, deprotonated

K-point grid: 3 1 1

80 ions

6.1530332564999997 0.0000000000000000 0.0000000000000000

0.0101505200000000 15.0948709692000005 0.0000000000000000  
-0.0586197378000000 -9.8991753724000002 28.3526808953999989

|    |             |             |             |
|----|-------------|-------------|-------------|
| Ba | 0.51157795  | 0.11971944  | 0.31820809  |
| Ba | 0.52228637  | 0.60261523  | 0.06549189  |
| Ba | 0.99509817  | 0.75994349  | 0.25378498  |
| Ba | 0.94704457  | 0.27288280  | 0.01254124  |
| Ba | -0.00641597 | 0.51087818  | 0.39644739  |
| Ba | 0.02033359  | 0.00808226  | 0.11851895  |
| Ba | 0.49338860  | 0.63728008  | 0.31941883  |
| Ba | 0.49669178  | 0.12185639  | 0.05289375  |
| Ba | 0.50374608  | 0.40355342  | 0.44638209  |
| Ba | 0.49846134  | 0.88371022  | 0.20044469  |
| Ba | 0.01165175  | -0.01030110 | 0.37011542  |
| Ba | 0.01308604  | 0.49274486  | 0.12600419  |
| Ba | 0.99093717  | 0.24279848  | 0.25269762  |
| Ba | 0.04945781  | 0.79390683  | 0.00359364  |
| Ba | 0.48442444  | 0.88085274  | 0.43032718  |
| Ba | 0.50636295  | 0.37235096  | 0.18992332  |
| Ce | 0.51262931  | 0.12056787  | 0.43654594  |
| Ce | 0.50084878  | 0.62713708  | 0.19079654  |
| Ce | 0.50229498  | 0.38058822  | 0.31562526  |
| Ce | 0.53421779  | 0.87736897  | 0.06531211  |
| Ce | -0.01217472 | 0.75381852  | 0.37647034  |
| Ce | 0.00210174  | 0.24981113  | 0.12187867  |
| Ce | 0.99753517  | 0.99535114  | 0.25273085  |
| Ce | 0.09352560  | 0.47994613  | -0.01380528 |
| Ce | 0.02396587  | 0.00526497  | 0.49913026  |
| Ce | 0.00184414  | 0.50047505  | 0.25018963  |
| Ce | 0.00698697  | 0.25360781  | 0.38111571  |
| Ce | 0.00065358  | 0.75028629  | 0.12193055  |
| Ce | 0.49402650  | 0.63755663  | 0.44770424  |
| Ce | 0.49992062  | 0.12441126  | 0.18895361  |
| Fe | 0.50214659  | 0.87380176  | 0.31365378  |
| Fe | 0.47786253  | 0.37054059  | 0.06853846  |
| O  | 0.23824195  | 0.68408832  | 0.40198556  |
| O  | 0.27968081  | 0.15995676  | 0.13432626  |
| O  | 0.47290587  | -0.01402411 | 0.36812305  |
| O  | 0.46500229  | 0.48907811  | 0.11939591  |
| O  | 0.53712362  | 0.76395649  | 0.25601891  |

|   |            |            |             |
|---|------------|------------|-------------|
| O | 0.52864581 | 0.27595006 | 0.01455007  |
| O | 0.91837398 | 0.37006647 | 0.43419049  |
| O | 0.94281269 | 0.86488028 | 0.18463798  |
| O | 0.30371560 | 0.46325362 | 0.27767608  |
| O | 0.31493653 | 0.93934238 | 0.03090842  |
| O | 0.33392337 | 0.21922991 | 0.41308871  |
| O | 0.28620411 | 0.69179776 | 0.14680690  |
| O | 0.27397017 | 0.55149177 | 0.46312904  |
| O | 0.23402840 | 0.04475876 | 0.20969331  |
| O | 0.27930684 | 0.81268406 | 0.33676688  |
| O | 0.24692263 | 0.31556748 | 0.08551818  |
| O | 0.72867976 | 0.57111687 | 0.46972438  |
| O | 0.73798954 | 0.07840440 | 0.23269665  |
| O | 0.94365539 | 0.63392550 | 0.30983616  |
| O | 0.92972194 | 0.15254887 | 0.05269850  |
| O | 0.00407463 | 0.89162599 | 0.43194252  |
| O | 0.05999924 | 0.37978267 | 0.18030406  |
| O | 0.06941417 | 0.11929074 | 0.31311080  |
| O | 0.20275670 | 0.61106641 | -0.00048414 |
| O | 0.78172058 | 0.14798780 | 0.39786906  |
| O | 0.78460445 | 0.65790265 | 0.14564916  |
| O | 0.78443447 | 0.40464940 | 0.27021007  |
| O | 0.79629395 | 0.92616340 | 0.03732842  |
| O | 0.73008143 | 0.82975600 | 0.34091552  |
| O | 0.72606228 | 0.33873980 | 0.09624621  |
| O | 0.21576051 | 0.07062340 | 0.45851822  |
| O | 0.20802011 | 0.59216875 | 0.22156860  |
| O | 0.54819035 | 0.50926261 | 0.37583944  |
| O | 0.58653501 | 0.98168969 | 0.13337528  |
| O | 0.72839689 | 0.28275148 | 0.33476208  |
| O | 0.76408498 | 0.74988944 | 0.06329707  |
| O | 0.71145973 | 0.04765932 | 0.47556608  |
| O | 0.69928825 | 0.53913069 | 0.21843846  |
| O | 0.70721671 | 0.71603941 | 0.40867306  |
| O | 0.77643389 | 0.18876043 | 0.16068458  |
| O | 0.72358463 | 0.93779503 | 0.28514890  |
| O | 0.82675167 | 0.47781887 | 0.02351171  |
| O | 0.21642578 | 0.34002279 | 0.34828788  |
| O | 0.21723322 | 0.82240173 | 0.08762659  |
| O | 0.26156596 | 0.92019602 | 0.27891894  |

|   |            |            |            |
|---|------------|------------|------------|
| O | 0.27497941 | 0.43312856 | 0.03160706 |
| O | 0.26727477 | 0.94275855 | 0.51718042 |
| O | 0.42271492 | 0.25709990 | 0.24588299 |

## S2.2: No oxygen vacancies, protonated

K-point grid: 3 1 1

82 ions

|                     |                     |                     |
|---------------------|---------------------|---------------------|
| 6.1530332564999997  | 0.0000000000000000  | 0.0000000000000000  |
| 0.0101505200000000  | 15.0948709692000005 | 0.0000000000000000  |
| -0.0586197378000000 | -9.8991753724000002 | 28.3526808953999989 |

|    |             |            |            |
|----|-------------|------------|------------|
| Ba | 0.50856101  | 0.11619317 | 0.31749413 |
| Ba | 0.53000212  | 0.59831094 | 0.06487039 |
| Ba | 0.99509817  | 0.75994349 | 0.25378498 |
| Ba | 0.94494799  | 0.26830447 | 0.01260610 |
| Ba | -0.00348334 | 0.50562342 | 0.38700208 |
| Ba | 0.02073003  | 0.00971640 | 0.11196224 |
| Ba | 0.49655107  | 0.63981518 | 0.31430831 |
| Ba | 0.49270117  | 0.12427551 | 0.05164896 |
| Ba | 0.50796944  | 0.39602234 | 0.43932127 |
| Ba | 0.49726783  | 0.88210624 | 0.19984256 |
| Ba | 0.00921263  | 0.98767373 | 0.36789138 |
| Ba | 0.01226339  | 0.48989583 | 0.12456915 |
| Ba | 0.99093717  | 0.24279848 | 0.25269762 |
| Ba | 0.04796443  | 0.78838771 | 0.00325543 |
| Ba | 0.48937622  | 0.87327132 | 0.42268461 |
| Ba | 0.50361747  | 0.37166248 | 0.18579964 |
| Ce | 0.50445918  | 0.11976925 | 0.43660730 |
| Ce | 0.50050693  | 0.62470619 | 0.18803722 |
| Ce | 0.49835023  | 0.37707302 | 0.31320537 |
| Ce | 0.53108734  | 0.87584605 | 0.06432685 |
| Ce | 0.99511085  | 0.75491205 | 0.37570336 |
| Ce | 0.00090729  | 0.25027490 | 0.12220334 |
| Ce | 0.99753517  | 0.99535114 | 0.25273085 |
| Ce | 0.09717891  | 0.47671229 | 0.98739698 |
| Ce | -0.00101656 | 0.01286967 | 0.49885219 |
| Ce | 0.00184414  | 0.50047505 | 0.25018963 |
| Ce | 0.00427733  | 0.25295959 | 0.38155581 |
| Ce | 0.00126514  | 0.75151344 | 0.12233519 |

|    |            |            |            |
|----|------------|------------|------------|
| Ce | 0.50688203 | 0.63384019 | 0.44340431 |
| Ce | 0.50164910 | 0.12226444 | 0.18747923 |
| Fe | 0.50198057 | 0.87383377 | 0.31184714 |
| Fe | 0.47758754 | 0.36777839 | 0.06692232 |
| O  | 0.25073257 | 0.68253504 | 0.40260349 |
| O  | 0.28533355 | 0.16193804 | 0.13485825 |
| O  | 0.46601678 | 0.99256051 | 0.37255866 |
| O  | 0.46176674 | 0.49177695 | 0.12245419 |
| O  | 0.53712362 | 0.76395649 | 0.25601891 |
| O  | 0.52838368 | 0.26602961 | 0.01444977 |
| O  | 0.92430143 | 0.37407099 | 0.43312314 |
| O  | 0.94126675 | 0.86133866 | 0.18808615 |
| O  | 0.30408961 | 0.46635413 | 0.28029640 |
| O  | 0.30874845 | 0.93877593 | 0.03108164 |
| O  | 0.33459641 | 0.21982500 | 0.41308804 |
| O  | 0.29510933 | 0.69642583 | 0.14644010 |
| O  | 0.24652168 | 0.55051683 | 0.46943338 |
| O  | 0.23402840 | 0.04475876 | 0.20969331 |
| O  | 0.27054701 | 0.81097340 | 0.33786672 |
| O  | 0.24521124 | 0.31558630 | 0.08661938 |
| O  | 0.74480275 | 0.57717085 | 0.46867272 |
| O  | 0.73798954 | 0.07840440 | 0.23269665 |
| O  | 0.94413419 | 0.63053363 | 0.31279451 |
| O  | 0.93065337 | 0.14704290 | 0.05471412 |
| O  | 0.03977918 | 0.89497451 | 0.43737777 |
| O  | 0.05897341 | 0.37945776 | 0.18279449 |
| O  | 0.06412439 | 0.12021600 | 0.31544379 |
| O  | 0.19940619 | 0.61052375 | 0.00290866 |
| O  | 0.78703763 | 0.14980567 | 0.40358451 |
| O  | 0.79184944 | 0.65554730 | 0.14482743 |
| O  | 0.79411388 | 0.40885883 | 0.27656506 |
| O  | 0.79019945 | 0.91956003 | 0.03335535 |
| O  | 0.73748882 | 0.82897201 | 0.34359514 |
| O  | 0.72659283 | 0.33584290 | 0.09676651 |
| O  | 0.20237751 | 0.08642750 | 0.46866156 |
| O  | 0.20802011 | 0.59216875 | 0.22156860 |
| O  | 0.54015705 | 0.50479902 | 0.37945663 |
| O  | 0.59469603 | 0.98143649 | 0.13199233 |
| O  | 0.71381352 | 0.28396752 | 0.33884380 |
| O  | 0.76108681 | 0.74919184 | 0.06356967 |



|   |            |            |            |
|---|------------|------------|------------|
| O | 0.68177477 | 0.03639166 | 0.47762153 |
| O | 0.69928825 | 0.53913069 | 0.21843846 |
| O | 0.71667328 | 0.71702634 | 0.41047666 |
| O | 0.77752112 | 0.19242561 | 0.16352086 |
| O | 0.72592039 | 0.93945991 | 0.28706500 |
| O | 0.83459162 | 0.47044440 | 0.02636941 |
| O | 0.21057830 | 0.33934849 | 0.34744267 |
| O | 0.20981678 | 0.82807718 | 0.08920984 |
| O | 0.26377652 | 0.92211821 | 0.28010720 |
| O | 0.28981846 | 0.42811973 | 0.03115467 |
| O | 0.13071851 | 0.96349842 | 0.55414746 |
| O | 0.42271492 | 0.25709990 | 0.24588299 |
| H | 0.16930126 | 0.92576125 | 0.57357881 |
| H | 0.10070619 | 0.55515319 | 0.48316112 |

### S2.3: 1 oxygen vacancy, deprotonated

K-point grid: 3 1 1

79 ions

```

6.1530332564999997  0.0000000000000000  0.0000000000000000
0.0101505200000000  15.0948709692000005  0.0000000000000000
-0.0586197378000000  -9.8991753724000002  28.3526808953999989

```

|    |            |            |             |
|----|------------|------------|-------------|
| Ba | 0.50642219 | 0.11763920 | 0.317199206 |
| Ba | 0.52979925 | 0.59938694 | 0.065105061 |
| Ba | 0.99509817 | 0.75994349 | 0.253784984 |
| Ba | 0.94510479 | 0.26948397 | 0.012662447 |
| Ba | 0.99869141 | 0.50979671 | 0.396047341 |
| Ba | 0.02058613 | 0.01076903 | 0.112458695 |
| Ba | 0.49812109 | 0.63427455 | 0.316130852 |
| Ba | 0.49287239 | 0.12569682 | 0.052091705 |
| Ba | 0.50477359 | 0.40375456 | 0.445512196 |
| Ba | 0.49715873 | 0.88240171 | 0.199179853 |
| Ba | 0.00738305 | 0.98564044 | 0.365308134 |
| Ba | 0.01289012 | 0.49078388 | 0.124829874 |
| Ba | 0.99093717 | 0.24279848 | 0.252697617 |
| Ba | 0.04848504 | 0.78942218 | 0.003738251 |
| Ba | 0.49225720 | 0.86880658 | 0.42052978  |
| Ba | 0.50571115 | 0.37175594 | 0.188092706 |
| Ce | 0.50161311 | 0.12092644 | 0.437064657 |

|    |             |            |             |
|----|-------------|------------|-------------|
| Ce | 0.50027189  | 0.62443785 | 0.188431983 |
| Ce | 0.50111254  | 0.37921198 | 0.314955943 |
| Ce | 0.53136501  | 0.87691914 | 0.064530792 |
| Ce | 0.99751193  | 0.75460515 | 0.375484311 |
| Ce | 0.00113647  | 0.25137185 | 0.122334126 |
| Ce | 0.99753517  | 0.99535114 | 0.252730846 |
| Ce | 0.09834375  | 0.47772595 | 0.987117869 |
| Ce | -0.00776074 | 0.02013492 | 0.498965705 |
| Ce | 0.00184414  | 0.50047505 | 0.250189632 |
| Ce | 0.00213360  | 0.25306177 | 0.381805951 |
| Ce | 0.00146291  | 0.75183888 | 0.1225463   |
| Ce | 0.50501642  | 0.63524508 | 0.446740152 |
| Ce | 0.50127745  | 0.12355565 | 0.18783615  |
| Fe | 0.50048263  | 0.87224583 | 0.310923001 |
| Fe | 0.47735788  | 0.36859760 | 0.067090256 |
| O  | 0.25913361  | 0.69471516 | 0.403113449 |
| O  | 0.28520879  | 0.16283352 | 0.134907357 |
| O  | 0.45923108  | 0.99547940 | 0.374835672 |
| O  | 0.46202518  | 0.49212233 | 0.121893497 |
| O  | 0.53712362  | 0.76395649 | 0.256018907 |
| O  | 0.52820527  | 0.26752005 | 0.014299488 |
| O  | 0.92160026  | 0.36896002 | 0.434943997 |
| O  | 0.94022514  | 0.86195947 | 0.188043142 |
| O  | 0.30334012  | 0.46363543 | 0.278818571 |
| O  | 0.30844752  | 0.93968308 | 0.031341826 |
| O  | 0.33592977  | 0.21688849 | 0.413307287 |
| O  | 0.29399476  | 0.69672406 | 0.146822079 |
| O  | 0.27713077  | 0.55238804 | 0.462744328 |
| O  | 0.23402840  | 0.04475876 | 0.209693313 |
| O  | 0.27066117  | 0.81259753 | 0.337121966 |
| O  | 0.24370381  | 0.31597981 | 0.085771297 |
| O  | 0.73569785  | 0.56818781 | 0.46941394  |
| O  | 0.73798954  | 0.07840440 | 0.232696652 |
| O  | 0.94598241  | 0.63215451 | 0.31220779  |
| O  | 0.93052922  | 0.14839436 | 0.054675814 |
| O  | 0.04870677  | 0.90621965 | 0.440162093 |
| O  | 0.06062605  | 0.38070891 | 0.1817336   |
| O  | 0.06324875  | 0.11805125 | 0.316147171 |
| O  | 0.20117181  | 0.61133921 | 0.002512163 |
| O  | 0.79238380  | 0.14622331 | 0.406726926 |

|   |            |            |             |
|---|------------|------------|-------------|
| O | 0.79110106 | 0.65653000 | 0.14515629  |
| O | 0.78548219 | 0.40537493 | 0.272036456 |
| O | 0.79025740 | 0.92051192 | 0.033478459 |
| O | 0.73545287 | 0.82996976 | 0.343632984 |
| O | 0.72571251 | 0.33679986 | 0.096445393 |
| O | 0.19859993 | 0.10465624 | 0.481685935 |
| O | 0.20802011 | 0.59216875 | 0.221568599 |
| O | 0.55090157 | 0.51014524 | 0.375330742 |
| O | 0.59426092 | 0.98225550 | 0.132142624 |
| O | 0.72175353 | 0.28116277 | 0.337101431 |
| O | 0.76195119 | 0.75024877 | 0.063893578 |
| O | 0.67444018 | 0.03680425 | 0.482345364 |
| O | 0.69928825 | 0.53913069 | 0.218438461 |
| O | 0.73517148 | 0.72161617 | 0.413748052 |
| O | 0.77906952 | 0.19207076 | 0.163270849 |
| O | 0.72432105 | 0.93954854 | 0.28704304  |
| O | 0.83537840 | 0.47238721 | 0.025879209 |
| O | 0.21702848 | 0.33843483 | 0.349486099 |
| O | 0.21107165 | 0.82849468 | 0.089593544 |
| O | 0.26428096 | 0.92144418 | 0.279580935 |
| O | 0.29003075 | 0.42940316 | 0.030942646 |
| O | 0.42271492 | 0.25709990 | 0.245882988 |

#### S2.4: 1 oxygen vacancy, protonated

K-point grid: 3 1 1

81 ions

|                     |                     |                     |
|---------------------|---------------------|---------------------|
| 6.1530332564999997  | 0.0000000000000000  | 0.0000000000000000  |
| 0.0101505200000000  | 15.0948709692000005 | 0.0000000000000000  |
| -0.0586197378000000 | -9.8991753724000002 | 28.3526808953999989 |

|    |             |            |            |
|----|-------------|------------|------------|
| Ba | 0.50115993  | 0.11482572 | 0.31512135 |
| Ba | 0.53213079  | 0.59692038 | 0.06417167 |
| Ba | 0.99509817  | 0.75994349 | 0.25378498 |
| Ba | 0.94533682  | 0.26792752 | 0.01234011 |
| Ba | -0.00007883 | 0.50430601 | 0.38439592 |
| Ba | 0.02003505  | 0.01028322 | 0.10904192 |
| Ba | 0.49708144  | 0.63905811 | 0.31168026 |
| Ba | 0.49210924  | 0.12504755 | 0.05067718 |
| Ba | 0.50761911  | 0.40060077 | 0.43923592 |

|    |            |             |            |
|----|------------|-------------|------------|
| Ba | 0.49675196 | 0.88137448  | 0.19876914 |
| Ba | 0.00863972 | -0.01458254 | 0.36462841 |
| Ba | 0.01152508 | 0.48896434  | 0.12353123 |
| Ba | 0.99093717 | 0.24279848  | 0.25269762 |
| Ba | 0.04623539 | 0.78611025  | 0.00297133 |
| Ba | 0.49682283 | 0.87166760  | 0.42014464 |
| Ba | 0.50154086 | 0.37111413  | 0.18303902 |
| Ce | 0.50825007 | 0.12735169  | 0.43874054 |
| Ce | 0.50106967 | 0.62471805  | 0.18686261 |
| Ce | 0.49867429 | 0.37639107  | 0.31282929 |
| Ce | 0.52914535 | 0.87536509  | 0.06362456 |
| Ce | 0.00083746 | 0.75680714  | 0.37603682 |
| Ce | 0.00072967 | 0.25054755  | 0.12199344 |
| Ce | 0.99753517 | 0.99535114  | 0.25273085 |
| Ce | 0.09521301 | 0.47690360  | 0.98782376 |
| Ce | 0.02035081 | 0.01478187  | 0.50416378 |
| Ce | 0.00184414 | 0.50047505  | 0.25018963 |
| Ce | 0.00186317 | 0.25354190  | 0.38308707 |
| Ce | 0.00170378 | 0.75218267  | 0.12227233 |
| Ce | 0.51745945 | 0.63585292  | 0.44318828 |
| Ce | 0.50266315 | 0.12154644  | 0.18631357 |
| Fe | 0.50273004 | 0.87317374  | 0.31084176 |
| Fe | 0.47831089 | 0.36731622  | 0.06612658 |
| O  | 0.27418631 | 0.69658142  | 0.40497988 |
| O  | 0.28821749 | 0.16259308  | 0.13472802 |
| O  | 0.46740668 | 0.00332033  | 0.37793079 |
| O  | 0.46128341 | 0.49276476  | 0.12299244 |
| O  | 0.53712362 | 0.76395649  | 0.25601891 |
| O  | 0.52918362 | 0.26370316  | 0.01402352 |
| O  | 0.92555728 | 0.37529818  | 0.43355524 |
| O  | 0.94140619 | 0.86046453  | 0.18966158 |
| O  | 0.30329975 | 0.46731784  | 0.28177851 |
| O  | 0.30683474 | 0.93781482  | 0.03017620 |
| O  | 0.34297057 | 0.22373804  | 0.41503712 |
| O  | 0.29985031 | 0.69903205  | 0.14646570 |
| O  | 0.24549040 | 0.55629648  | 0.46844280 |
| O  | 0.23402840 | 0.04475876  | 0.20969331 |
| O  | 0.26705935 | 0.81313847  | 0.33832708 |
| O  | 0.24725603 | 0.31580529  | 0.08738267 |
| O  | 0.74950021 | 0.57635461  | 0.46887262 |

|   |            |            |            |
|---|------------|------------|------------|
| O | 0.73798954 | 0.07840440 | 0.23269665 |
| O | 0.94570266 | 0.62869414 | 0.31610236 |
| O | 0.93164139 | 0.14537739 | 0.05510924 |
| O | 0.04914684 | 0.91277579 | 0.43986991 |
| O | 0.05770230 | 0.37968377 | 0.18411676 |
| O | 0.05755544 | 0.12130912 | 0.31849238 |
| O | 0.19423009 | 0.61235460 | 0.00573359 |
| O | 0.82230082 | 0.14953150 | 0.41695468 |
| O | 0.79525108 | 0.65485790 | 0.14474522 |
| O | 0.80073292 | 0.41040659 | 0.27996089 |
| O | 0.78768232 | 0.91754986 | 0.03179771 |
| O | 0.74045182 | 0.82753351 | 0.34420233 |
| O | 0.72771874 | 0.33454222 | 0.09693883 |
| O | 0.27017211 | 0.09872735 | 0.49865314 |
| O | 0.20802011 | 0.59216875 | 0.22156860 |
| O | 0.54346604 | 0.50796855 | 0.37878290 |
| O | 0.59740758 | 0.98161352 | 0.13137386 |
| O | 0.70807795 | 0.28293285 | 0.34145563 |
| O | 0.75826951 | 0.74981935 | 0.06383272 |
| O | 0.66606615 | 0.03847968 | 0.49628430 |
| O | 0.69928825 | 0.53913069 | 0.21843846 |
| O | 0.74137616 | 0.72911217 | 0.41913141 |
| O | 0.77946449 | 0.19379747 | 0.16460265 |
| O | 0.72716109 | 0.94056396 | 0.28770077 |
| O | 0.83514035 | 0.46773046 | 0.02753949 |
| O | 0.21219718 | 0.33902612 | 0.34878197 |
| O | 0.20660158 | 0.83137350 | 0.08990399 |
| O | 0.26621909 | 0.92422334 | 0.28050469 |
| O | 0.29171937 | 0.42690950 | 0.03069731 |
| O | 0.42271492 | 0.25709990 | 0.24588299 |
| H | 0.09735942 | 0.56055315 | 0.48117678 |
| H | 0.51708753 | 0.06273157 | 0.50795361 |

## S2.5: 2 oxygen vacancy, deprotonated

K-point grid: 3 1 1

78 ions

|                     |                     |                     |
|---------------------|---------------------|---------------------|
| 6.1530332564999997  | 0.0000000000000000  | 0.0000000000000000  |
| 0.0101505200000000  | 15.0948709692000005 | 0.0000000000000000  |
| -0.0586197378000000 | -9.8991753724000002 | 28.3526808953999989 |

|    |            |            |            |
|----|------------|------------|------------|
| Ba | 0.49931555 | 0.11002014 | 0.31403954 |
| Ba | 0.53289141 | 0.59690556 | 0.06465605 |
| Ba | 0.99509817 | 0.75994349 | 0.25378498 |
| Ba | 0.94577596 | 0.26838840 | 0.01223385 |
| Ba | 0.01638992 | 0.51667537 | 0.38206760 |
| Ba | 0.02032120 | 0.01097746 | 0.10837343 |
| Ba | 0.50193360 | 0.63947018 | 0.31361767 |
| Ba | 0.49211586 | 0.12573291 | 0.05003776 |
| Ba | 0.50299330 | 0.38549894 | 0.43630223 |
| Ba | 0.49643271 | 0.88002885 | 0.19829544 |
| Ba | 0.01993615 | 0.98301792 | 0.36706881 |
| Ba | 0.01268302 | 0.48937031 | 0.12364180 |
| Ba | 0.99093717 | 0.24279848 | 0.25269762 |
| Ba | 0.04605802 | 0.78598230 | 0.00315018 |
| Ba | 0.51437839 | 0.87456867 | 0.42174133 |
| Ba | 0.50349904 | 0.37144348 | 0.18285609 |
| Ce | 0.51936344 | 0.12791562 | 0.44091848 |
| Ce | 0.50100802 | 0.62508359 | 0.18754915 |
| Ce | 0.50257947 | 0.38022678 | 0.31210292 |
| Ce | 0.52888853 | 0.87553482 | 0.06358984 |
| Ce | 0.01148323 | 0.75549074 | 0.37758666 |
| Ce | 0.00183551 | 0.25119559 | 0.12192787 |
| Ce | 0.99753517 | 0.99535114 | 0.25273085 |
| Ce | 0.09530997 | 0.47795400 | 0.98817862 |
| Ce | 0.03554846 | 0.01360099 | 0.50029092 |
| Ce | 0.00184414 | 0.50047505 | 0.25018963 |
| Ce | 0.00214551 | 0.25165029 | 0.38121688 |
| Ce | 0.00231169 | 0.75239566 | 0.12238264 |
| Ce | 0.52395941 | 0.62106401 | 0.44071552 |
| Ce | 0.50378034 | 0.12162508 | 0.18577934 |
| Fe | 0.51068088 | 0.87575332 | 0.31177489 |
| Fe | 0.47904361 | 0.36756268 | 0.06593750 |
| O  | 0.27368653 | 0.68525408 | 0.40058541 |
| O  | 0.29173694 | 0.16314818 | 0.13440223 |
| O  | 0.48841992 | 0.00798624 | 0.37574600 |
| O  | 0.46172782 | 0.49296896 | 0.12303195 |
| O  | 0.53712362 | 0.76395649 | 0.25601891 |
| O  | 0.53025443 | 0.26389200 | 0.01369224 |
| O  | 0.75471274 | 0.22591618 | 0.42965760 |

|   |            |            |            |
|---|------------|------------|------------|
| O | 0.94253193 | 0.86074854 | 0.19021876 |
| O | 0.29970898 | 0.46296433 | 0.27988819 |
| O | 0.30658291 | 0.93764553 | 0.02999537 |
| O | 0.27787510 | 0.21161177 | 0.41881279 |
| O | 0.30033104 | 0.69998241 | 0.14691196 |
| O | 0.28573540 | 0.53731889 | 0.45296880 |
| O | 0.23402840 | 0.04475876 | 0.20969331 |
| O | 0.27559105 | 0.81912928 | 0.34078277 |
| O | 0.24758270 | 0.31537311 | 0.08666977 |
| O | 0.75132949 | 0.53007756 | 0.45296369 |
| O | 0.73798954 | 0.07840440 | 0.23269665 |
| O | 0.95303655 | 0.62857883 | 0.31527768 |
| O | 0.93135631 | 0.14536053 | 0.05533925 |
| O | 0.09146828 | 0.89417363 | 0.44416544 |
| O | 0.06029643 | 0.38101282 | 0.18301722 |
| O | 0.04313730 | 0.12198291 | 0.32163517 |
| O | 0.19236536 | 0.61397819 | 0.00737514 |
| O | 0.80108636 | 0.04748549 | 0.45951766 |
| O | 0.79569790 | 0.65583044 | 0.14527850 |
| O | 0.79746700 | 0.40366963 | 0.27483344 |
| O | 0.78727866 | 0.91736896 | 0.03158087 |
| O | 0.75183246 | 0.82929516 | 0.34480477 |
| O | 0.72789900 | 0.33426973 | 0.09676772 |
| O | 0.32438658 | 0.07430145 | 0.49290774 |
| O | 0.20802011 | 0.59216875 | 0.22156860 |
| O | 0.56091049 | 0.51472549 | 0.36622507 |
| O | 0.59877599 | 0.98191428 | 0.13137269 |
| O | 0.72297474 | 0.29350568 | 0.34589161 |
| O | 0.75768423 | 0.75049386 | 0.06425065 |
| O | 0.69928825 | 0.53913069 | 0.21843846 |
| O | 0.74855014 | 0.72268447 | 0.41855976 |
| O | 0.78507334 | 0.19390238 | 0.16564789 |
| O | 0.73502574 | 0.94112693 | 0.28798947 |
| O | 0.83512942 | 0.46734981 | 0.02758622 |
| O | 0.22088654 | 0.34408734 | 0.35783142 |
| O | 0.20643449 | 0.83276046 | 0.09049040 |
| O | 0.27223789 | 0.92857290 | 0.28147802 |
| O | 0.29262909 | 0.42718323 | 0.03056785 |
| O | 0.42271492 | 0.25709990 | 0.24588299 |

## S2.6: 2 oxygen vacancy, protonated

K-point grid: 3 1 1

80 ions

6.1530332564999997 0.0000000000000000 0.0000000000000000  
0.0101505200000000 15.0948709692000005 0.0000000000000000  
-0.0586197378000000 -9.8991753724000002 28.3526808953999989

|    |            |            |            |
|----|------------|------------|------------|
| Ba | 0.49874382 | 0.10870240 | 0.31224263 |
| Ba | 0.53481391 | 0.59596035 | 0.06418996 |
| Ba | 0.99509817 | 0.75994349 | 0.25378498 |
| Ba | 0.94613517 | 0.26779821 | 0.01182606 |
| Ba | 0.01856567 | 0.51051379 | 0.37529017 |
| Ba | 0.01976830 | 0.01076351 | 0.10719193 |
| Ba | 0.49657804 | 0.64339652 | 0.31075004 |
| Ba | 0.49259479 | 0.12379510 | 0.04875226 |
| Ba | 0.51724018 | 0.38405126 | 0.43432803 |
| Ba | 0.49649774 | 0.87944176 | 0.19853208 |
| Ba | 0.01561060 | 0.98460959 | 0.36617122 |
| Ba | 0.01305150 | 0.48843597 | 0.12288875 |
| Ba | 0.99093717 | 0.24279848 | 0.25269762 |
| Ba | 0.04374447 | 0.78530565 | 0.00292848 |
| Ba | 0.49995358 | 0.87725384 | 0.42544130 |
| Ba | 0.50305795 | 0.37028068 | 0.17904038 |
| Ce | 0.52811978 | 0.12565512 | 0.43882646 |
| Ce | 0.50275696 | 0.62553370 | 0.18659446 |
| Ce | 0.50343057 | 0.37904328 | 0.31184395 |
| Ce | 0.52715470 | 0.87505486 | 0.06336724 |
| Ce | 0.00706122 | 0.75477092 | 0.37728422 |
| Ce | 0.00317573 | 0.25040767 | 0.12158462 |
| Ce | 0.99753517 | 0.99535114 | 0.25273085 |
| Ce | 0.09189563 | 0.47919167 | 0.98912414 |
| Ce | 0.02422567 | 0.02545240 | 0.50711994 |
| Ce | 0.00184414 | 0.50047505 | 0.25018963 |
| Ce | 0.00922289 | 0.25119302 | 0.38209766 |
| Ce | 0.00349970 | 0.75228239 | 0.12194506 |
| Ce | 0.53633120 | 0.62598077 | 0.44006005 |
| Ce | 0.50447063 | 0.12073881 | 0.18492996 |
| Fe | 0.50973110 | 0.87990365 | 0.31404617 |
| Fe | 0.48034600 | 0.36721465 | 0.06520470 |



|   |            |            |            |
|---|------------|------------|------------|
| O | 0.28631525 | 0.68409584 | 0.40015414 |
| O | 0.29478527 | 0.16292724 | 0.13375572 |
| O | 0.49483215 | 0.00702530 | 0.37375342 |
| O | 0.46234499 | 0.49334593 | 0.12321975 |
| O | 0.53712362 | 0.76395649 | 0.25601891 |
| O | 0.53030744 | 0.26208485 | 0.01340493 |
| O | 0.76725823 | 0.22902224 | 0.43319628 |
| O | 0.94406546 | 0.85908393 | 0.19113464 |
| O | 0.29127426 | 0.47026501 | 0.28652512 |
| O | 0.30538127 | 0.93690406 | 0.02942683 |
| O | 0.29557217 | 0.21634512 | 0.41894160 |
| O | 0.30476067 | 0.70143071 | 0.14683241 |
| O | 0.25407330 | 0.53617098 | 0.46014537 |
| O | 0.23402840 | 0.04475876 | 0.20969331 |
| O | 0.26379050 | 0.82389266 | 0.34467080 |
| O | 0.25081718 | 0.31599295 | 0.08769745 |
| O | 0.76514050 | 0.54422260 | 0.45787970 |
| O | 0.73798954 | 0.07840440 | 0.23269665 |
| O | 0.94039606 | 0.62904609 | 0.31793761 |
| O | 0.93228200 | 0.14435978 | 0.05533913 |
| O | 0.08616772 | 0.87203109 | 0.47086897 |
| O | 0.06117666 | 0.37988899 | 0.18496384 |
| O | 0.04365787 | 0.12262256 | 0.32221985 |
| O | 0.18239673 | 0.61687853 | 0.01208941 |
| O | 0.80260629 | 0.03147551 | 0.45681675 |
| O | 0.79922369 | 0.65457729 | 0.14506538 |
| O | 0.80747280 | 0.40828305 | 0.28012087 |
| O | 0.78544533 | 0.91678275 | 0.03109564 |
| O | 0.74914144 | 0.82940786 | 0.34854822 |
| O | 0.73105384 | 0.33355401 | 0.09676576 |
| O | 0.30913588 | 0.05720152 | 0.48138158 |
| O | 0.20802011 | 0.59216875 | 0.22156860 |
| O | 0.56614794 | 0.51430570 | 0.37170562 |
| O | 0.60075693 | 0.98156835 | 0.13113933 |
| O | 0.72496506 | 0.29769316 | 0.34870163 |
| O | 0.75461534 | 0.75103782 | 0.06460162 |
| O | 0.69928825 | 0.53913069 | 0.21843846 |
| O | 0.76257714 | 0.73898032 | 0.43025228 |
| O | 0.78707992 | 0.19501023 | 0.16632882 |
| O | 0.73816537 | 0.94119591 | 0.28903514 |

|   |            |            |            |
|---|------------|------------|------------|
| O | 0.83302066 | 0.46382727 | 0.02816892 |
| O | 0.22733306 | 0.34709079 | 0.35917354 |
| O | 0.20328569 | 0.83532188 | 0.09106362 |
| O | 0.27324462 | 0.93031360 | 0.28245799 |
| O | 0.29265878 | 0.42623187 | 0.03030215 |
| O | 0.42271492 | 0.25709990 | 0.24588299 |
| H | 0.10543544 | 0.54909242 | 0.47275252 |
| H | 0.97826057 | 0.82153053 | 0.46870422 |

### S2.7: 3 oxygen vacancy, deprotonated

K-point grid: 3 1 1

77 ions

|                     |                     |                     |
|---------------------|---------------------|---------------------|
| 6.1530332564999997  | 0.0000000000000000  | 0.0000000000000000  |
| 0.0101505200000000  | 15.0948709692000005 | 0.0000000000000000  |
| -0.0586197378000000 | -9.8991753724000002 | 28.3526808953999989 |

|    |            |            |            |
|----|------------|------------|------------|
| Ba | 0.49564223 | 0.11187687 | 0.31281853 |
| Ba | 0.53441143 | 0.59560792 | 0.06340167 |
| Ba | 0.99509817 | 0.75994349 | 0.25378498 |
| Ba | 0.94639731 | 0.26713649 | 0.01170391 |
| Ba | 0.01050175 | 0.50114057 | 0.37234381 |
| Ba | 0.02058532 | 0.00986715 | 0.10736500 |
| Ba | 0.48973185 | 0.64482330 | 0.30910011 |
| Ba | 0.49398111 | 0.12263390 | 0.04882425 |
| Ba | 0.51731730 | 0.39612060 | 0.43973791 |
| Ba | 0.49679544 | 0.88038348 | 0.19830070 |
| Ba | 0.00672143 | 0.98037792 | 0.36311503 |
| Ba | 0.01283223 | 0.48804647 | 0.12229380 |
| Ba | 0.99093717 | 0.24279848 | 0.25269762 |
| Ba | 0.04499422 | 0.78474917 | 0.00248864 |
| Ba | 0.47837817 | 0.87565993 | 0.42145745 |
| Ba | 0.50282769 | 0.36913924 | 0.17784930 |
| Ce | 0.51570471 | 0.12450031 | 0.44001932 |
| Ce | 0.50295180 | 0.62482815 | 0.18578980 |
| Ce | 0.50434523 | 0.37488512 | 0.31282407 |
| Ce | 0.52836456 | 0.87449764 | 0.06311457 |
| Ce | 0.98465783 | 0.75763864 | 0.37736343 |
| Ce | 0.00371656 | 0.24969738 | 0.12145784 |
| Ce | 0.99753517 | 0.99535114 | 0.25273085 |

|    |            |            |            |
|----|------------|------------|------------|
| Ce | 0.09314111 | 0.47730899 | 0.98817391 |
| Ce | 0.02184086 | 0.04321021 | 0.49390966 |
| Ce | 0.00184414 | 0.50047505 | 0.25018963 |
| Ce | 0.01444093 | 0.25877180 | 0.38339232 |
| Ce | 0.00291736 | 0.75227545 | 0.12186874 |
| Ce | 0.49861489 | 0.63787253 | 0.44261629 |
| Ce | 0.50450199 | 0.12065693 | 0.18515487 |
| Fe | 0.50491480 | 0.87517252 | 0.31155276 |
| Fe | 0.48072018 | 0.36682550 | 0.06505963 |
| O  | 0.24060330 | 0.68153936 | 0.40381734 |
| O  | 0.29315139 | 0.16220152 | 0.13375497 |
| O  | 0.49432110 | 0.00606902 | 0.37685494 |
| O  | 0.46274013 | 0.49285396 | 0.12290041 |
| O  | 0.53712362 | 0.76395649 | 0.25601891 |
| O  | 0.53064229 | 0.26121634 | 0.01350005 |
| O  | 0.94052359 | 0.38334271 | 0.43424917 |
| O  | 0.94376588 | 0.85974309 | 0.19045090 |
| O  | 0.28992790 | 0.47461124 | 0.29199321 |
| O  | 0.30664431 | 0.93665190 | 0.02929580 |
| O  | 0.35415090 | 0.22231105 | 0.41518288 |
| O  | 0.30405421 | 0.70005604 | 0.14610902 |
| O  | 0.23402840 | 0.04475876 | 0.20969331 |
| O  | 0.25735123 | 0.81540099 | 0.34092277 |
| O  | 0.25183558 | 0.31637482 | 0.08830307 |
| O  | 0.41452191 | 0.56874601 | 0.48513498 |
| O  | 0.73798954 | 0.07840440 | 0.23269665 |
| O  | 0.93080885 | 0.62847027 | 0.31678251 |
| O  | 0.93373612 | 0.14398300 | 0.05503061 |
| O  | 0.02136342 | 0.91463196 | 0.44064255 |
| O  | 0.06029662 | 0.37827538 | 0.18634539 |
| O  | 0.04427923 | 0.12226864 | 0.32322481 |
| O  | 0.18751347 | 0.61421531 | 0.00899696 |
| O  | 0.88365767 | 0.11685839 | 0.45044873 |
| O  | 0.79875574 | 0.65384473 | 0.14449588 |
| O  | 0.81118560 | 0.41318063 | 0.28513686 |
| O  | 0.78679148 | 0.91671647 | 0.03106300 |
| O  | 0.73263519 | 0.82593386 | 0.34510035 |
| O  | 0.73289040 | 0.33361540 | 0.09667518 |
| O  | 0.36422034 | 0.05655676 | 0.48826811 |
| O  | 0.20802011 | 0.59216875 | 0.22156860 |

|   |            |            |            |
|---|------------|------------|------------|
| O | 0.57163865 | 0.50371123 | 0.38607659 |
| O | 0.59989291 | 0.98103926 | 0.13099226 |
| O | 0.70843666 | 0.28175583 | 0.34450078 |
| O | 0.75637342 | 0.74993878 | 0.06384100 |
| O | 0.69928825 | 0.53913069 | 0.21843846 |
| O | 0.72457545 | 0.73138168 | 0.42407377 |
| O | 0.78321805 | 0.19484411 | 0.16529575 |
| O | 0.73048358 | 0.93949556 | 0.28750641 |
| O | 0.83437964 | 0.46441420 | 0.02797538 |
| O | 0.21287357 | 0.33550403 | 0.34767888 |
| O | 0.20466480 | 0.83359344 | 0.09022529 |
| O | 0.26849655 | 0.92699303 | 0.28120745 |
| O | 0.29268621 | 0.42534077 | 0.03006186 |
| O | 0.42271492 | 0.25709990 | 0.24588299 |

## S2.8: 3 oxygen vacancy, protonated

K-point grid: 3 1 1

79 ions

```

6.1530332564999997  0.0000000000000000  0.0000000000000000
0.0101505200000000  15.0948709692000005  0.0000000000000000
-0.0586197378000000  -9.8991753724000002  28.3526808953999989

```

|    |            |            |            |
|----|------------|------------|------------|
| Ba | 0.50248925 | 0.11318835 | 0.31474879 |
| Ba | 0.53435746 | 0.59523073 | 0.06296366 |
| Ba | 0.99509817 | 0.75994349 | 0.25378498 |
| Ba | 0.94753140 | 0.26626775 | 0.01167935 |
| Ba | 0.00992193 | 0.49406847 | 0.37188596 |
| Ba | 0.02035912 | 0.00982573 | 0.10732397 |
| Ba | 0.48547380 | 0.64535994 | 0.30687811 |
| Ba | 0.49486710 | 0.12242914 | 0.04912513 |
| Ba | 0.52566444 | 0.38437488 | 0.43666950 |
| Ba | 0.49671913 | 0.88081345 | 0.19997980 |
| Ba | 0.00211149 | 0.99084892 | 0.36663265 |
| Ba | 0.01325659 | 0.48737312 | 0.12188677 |
| Ba | 0.99093717 | 0.24279848 | 0.25269762 |
| Ba | 0.04453238 | 0.78474799 | 0.00251630 |
| Ba | 0.46589928 | 0.87473259 | 0.42381810 |
| Ba | 0.50351190 | 0.36844318 | 0.17736736 |
| Ce | 0.50597779 | 0.12057268 | 0.43727122 |

|    |            |            |            |
|----|------------|------------|------------|
| Ce | 0.50361570 | 0.62445739 | 0.18511990 |
| Ce | 0.50135403 | 0.37399348 | 0.31162333 |
| Ce | 0.52808279 | 0.87431785 | 0.06334158 |
| Ce | 0.98263103 | 0.75289014 | 0.37571197 |
| Ce | 0.00435037 | 0.24944155 | 0.12157099 |
| Ce | 0.99753517 | 0.99535114 | 0.25273085 |
| Ce | 0.09247971 | 0.47655232 | 0.98804927 |
| Ce | 0.01585261 | 0.02137238 | 0.51119654 |
| Ce | 0.00184414 | 0.50047505 | 0.25018963 |
| Ce | 0.00610892 | 0.25543056 | 0.38324516 |
| Ce | 0.00234834 | 0.75231581 | 0.12191152 |
| Ce | 0.50245961 | 0.63697373 | 0.44116586 |
| Ce | 0.50420314 | 0.11994301 | 0.18533241 |
| Fe | 0.50203382 | 0.87821453 | 0.31416140 |
| Fe | 0.48160231 | 0.36648471 | 0.06489682 |
| O  | 0.25044427 | 0.67592430 | 0.40215564 |
| O  | 0.29282832 | 0.16203339 | 0.13400990 |
| O  | 0.48407305 | 0.99760506 | 0.37492851 |
| O  | 0.46329120 | 0.49248021 | 0.12264690 |
| O  | 0.53712362 | 0.76395649 | 0.25601891 |
| O  | 0.53152417 | 0.26064963 | 0.01342391 |
| O  | 0.94640184 | 0.38921488 | 0.43154829 |
| O  | 0.94281250 | 0.85829320 | 0.19097779 |
| O  | 0.28844540 | 0.47679600 | 0.29235232 |
| O  | 0.30661049 | 0.93683437 | 0.02962182 |
| O  | 0.32859291 | 0.21865947 | 0.41641163 |
| O  | 0.30442305 | 0.69982316 | 0.14589400 |
| O  | 0.23402840 | 0.04475876 | 0.20969331 |
| O  | 0.24782335 | 0.81646401 | 0.34355687 |
| O  | 0.25322621 | 0.31594721 | 0.08837118 |
| O  | 0.43562401 | 0.56317451 | 0.49563076 |
| O  | 0.73798954 | 0.07840440 | 0.23269665 |
| O  | 0.91977942 | 0.62831390 | 0.31725867 |
| O  | 0.93505996 | 0.14367054 | 0.05510830 |
| O  | 0.03160043 | 0.87282269 | 0.46774548 |
| O  | 0.06091469 | 0.37819516 | 0.18650058 |
| O  | 0.05561287 | 0.12204821 | 0.31985350 |
| O  | 0.18690396 | 0.61342381 | 0.00862750 |
| O  | 0.80389827 | 0.16129960 | 0.41473690 |
| O  | 0.79931050 | 0.65277684 | 0.14401315 |

|   |            |            |            |
|---|------------|------------|------------|
| O | 0.81030263 | 0.41391554 | 0.28492661 |
| O | 0.78601092 | 0.91651052 | 0.03112347 |
| O | 0.72971360 | 0.82757410 | 0.34919447 |
| O | 0.73405575 | 0.33328592 | 0.09656472 |
| O | 0.22729822 | 0.04574274 | 0.46644157 |
| O | 0.20802011 | 0.59216875 | 0.22156860 |
| O | 0.56733405 | 0.50486827 | 0.38898210 |
| O | 0.60062483 | 0.98048868 | 0.13111381 |
| O | 0.70696381 | 0.28499643 | 0.34310942 |
| O | 0.75621569 | 0.74946020 | 0.06368365 |
| O | 0.69928825 | 0.53913069 | 0.21843846 |
| O | 0.73669781 | 0.73760872 | 0.43281015 |
| O | 0.78169641 | 0.19469515 | 0.16499604 |
| O | 0.73174881 | 0.94074065 | 0.28946595 |
| O | 0.83382189 | 0.46380019 | 0.02794778 |
| O | 0.21920415 | 0.33409902 | 0.34637326 |
| O | 0.20327065 | 0.83327486 | 0.09007743 |
| O | 0.26604286 | 0.92696262 | 0.28245505 |
| O | 0.29238527 | 0.42469597 | 0.02994781 |
| O | 0.42271492 | 0.25709990 | 0.24588299 |
| H | 0.36799438 | 0.57322751 | 0.52606057 |
| H | 0.92422563 | 0.82174602 | 0.46642467 |

### S3: Cubic BCF8515 Slabs

#### S3.1: No oxygen vacancies, deprotonated

K-point grid: 2 1 2

80 ions

```

8.7570569223000003  0.0000000000000000  0.0000000000000000
0.0000000000000000 -32.5141138445999971  0.0000000000000000
0.0000000000000000  0.0000000000000000 -8.7570569223000003

```

|    |            |            |            |
|----|------------|------------|------------|
| Ba | 0.25934391 | 0.06723792 | 0.25934391 |
| Ba | 0.25885388 | 0.33863710 | 0.25885388 |
| Ba | 0.25934391 | 0.06723792 | 0.74065609 |
| Ba | 0.25885388 | 0.33863710 | 0.74114612 |
| Ba | 0.26137730 | 0.19893395 | 0.26137730 |
| Ba | 0.26343444 | 0.46224361 | 0.26343444 |
| Ba | 0.26137730 | 0.19893395 | 0.73862270 |
| Ba | 0.26343444 | 0.46224361 | 0.73656556 |

|    |            |             |            |
|----|------------|-------------|------------|
| Ba | 0.74065609 | 0.06723792  | 0.25934391 |
| Ba | 0.74114612 | 0.33863710  | 0.25885388 |
| Ba | 0.74065609 | 0.06723792  | 0.74065609 |
| Ba | 0.74114612 | 0.33863710  | 0.74114612 |
| Ba | 0.73862270 | 0.19893395  | 0.26137730 |
| Ba | 0.73656556 | 0.46224361  | 0.26343444 |
| Ba | 0.73862270 | 0.19893395  | 0.73862270 |
| Ba | 0.73656556 | 0.46224361  | 0.73656556 |
| Ce | 0.00000000 | -0.00062674 | 0.00000000 |
| Ce | 0.00000000 | 0.26933094  | 0.00000000 |
| Ce | 0.00000000 | -0.00141820 | 0.50000000 |
| Ce | 0.00000000 | 0.26933094  | 0.50000000 |
| Ce | 0.00000000 | 0.13416315  | 0.00000000 |
| Ce | 0.00000000 | 0.40808025  | 0.00000000 |
| Ce | 0.00000000 | 0.13359708  | 0.50000000 |
| Ce | 0.00000000 | 0.40671263  | 0.50000000 |
| Ce | 0.50000000 | -0.00141820 | 0.00000000 |
| Ce | 0.50000000 | 0.26933094  | 0.00000000 |
| Ce | 0.50000000 | 0.00410364  | 0.50000000 |
| Ce | 0.50000000 | 0.26933094  | 0.50000000 |
| Ce | 0.50000000 | 0.13359708  | 0.00000000 |
| Ce | 0.50000000 | 0.40671263  | 0.00000000 |
| Fe | 0.50000000 | 0.13509890  | 0.50000000 |
| Fe | 0.50000000 | 0.40466112  | 0.50000000 |
| O  | 0.00000000 | 0.06498902  | 0.00000000 |
| O  | 0.00000000 | 0.33857273  | 0.00000000 |
| O  | 0.00000000 | 0.00194570  | 0.74746845 |
| O  | 0.00000000 | 0.26933094  | 0.74718398 |
| O  | 0.00000000 | 0.13439127  | 0.25315063 |
| O  | 0.00000000 | 0.40657832  | 0.25396546 |
| O  | 0.00000000 | 0.13439127  | 0.74684937 |
| O  | 0.00000000 | 0.40657832  | 0.74603454 |
| O  | 0.50000000 | 0.00740133  | 0.25139967 |
| O  | 0.50000000 | 0.26933094  | 0.25378416 |
| O  | 0.50000000 | 0.00740133  | 0.74860033 |
| O  | 0.50000000 | 0.26933094  | 0.74621584 |
| O  | 0.50000000 | 0.13490927  | 0.27361986 |
| O  | 0.50000000 | 0.40460909  | 0.27326473 |
| O  | 0.50000000 | 0.13490927  | 0.72638014 |
| O  | 0.50000000 | 0.40460909  | 0.72673527 |

|   |            |            |            |
|---|------------|------------|------------|
| O | 0.25253155 | 0.00194570 | 0.00000000 |
| O | 0.25281602 | 0.26933094 | 0.00000000 |
| O | 0.25139967 | 0.00740133 | 0.50000000 |
| O | 0.25378416 | 0.26933094 | 0.50000000 |
| O | 0.25315063 | 0.13439127 | 0.00000000 |
| O | 0.25396546 | 0.40657832 | 0.00000000 |
| O | 0.00000000 | 0.06561690 | 0.50000000 |
| O | 0.00000000 | 0.33858604 | 0.50000000 |
| O | 0.27361986 | 0.13490927 | 0.50000000 |
| O | 0.27326473 | 0.40460909 | 0.50000000 |
| O | 0.74746845 | 0.00194570 | 0.00000000 |
| O | 0.74718398 | 0.26933094 | 0.00000000 |
| O | 0.74860033 | 0.00740133 | 0.50000000 |
| O | 0.74621584 | 0.26933094 | 0.50000000 |
| O | 0.74684937 | 0.13439127 | 0.00000000 |
| O | 0.74603454 | 0.40657832 | 0.00000000 |
| O | 0.72638014 | 0.13490927 | 0.50000000 |
| O | 0.72673527 | 0.40460909 | 0.50000000 |
| O | 0.00000000 | 0.20123977 | 0.00000000 |
| O | 0.00000000 | 0.47290318 | 0.00000000 |
| O | 0.00000000 | 0.20097902 | 0.50000000 |
| O | 0.00000000 | 0.47273850 | 0.50000000 |
| O | 0.50000000 | 0.06561690 | 0.00000000 |
| O | 0.50000000 | 0.33858604 | 0.00000000 |
| O | 0.50000000 | 0.07306573 | 0.50000000 |
| O | 0.50000000 | 0.34318118 | 0.50000000 |
| O | 0.50000000 | 0.20097902 | 0.00000000 |
| O | 0.50000000 | 0.47273850 | 0.00000000 |
| O | 0.50000000 | 0.19546987 | 0.50000000 |
| O | 0.50000000 | 0.46272029 | 0.50000000 |
| O | 0.00000000 | 0.00194570 | 0.25253155 |
| O | 0.00000000 | 0.26933094 | 0.25281602 |

### S3.2: No oxygen vacancies, protonated

K-point grid: 2 1 2

82 ions

|                    |                      |                     |
|--------------------|----------------------|---------------------|
| 8.7570569223000003 | 0.0000000000000000   | 0.0000000000000000  |
| 0.0000000000000000 | -32.5141138445999971 | 0.0000000000000000  |
| 0.0000000000000000 | 0.0000000000000000   | -8.7570569223000003 |



|    |            |            |            |
|----|------------|------------|------------|
| Ba | 0.26117123 | 0.06786246 | 0.26116931 |
| Ba | 0.26324238 | 0.33718206 | 0.26254707 |
| Ba | 0.26121539 | 0.06786203 | 0.73882865 |
| Ba | 0.26237180 | 0.33700015 | 0.73779339 |
| Ba | 0.26137730 | 0.19893395 | 0.26137730 |
| Ba | 0.26749939 | 0.46254403 | 0.27031809 |
| Ba | 0.26137730 | 0.19893395 | 0.73862270 |
| Ba | 0.26671439 | 0.46281675 | 0.73465533 |
| Ba | 0.73882718 | 0.06786259 | 0.26118420 |
| Ba | 0.73937386 | 0.33668822 | 0.26088189 |
| Ba | 0.73882008 | 0.06786192 | 0.73877228 |
| Ba | 0.74004022 | 0.33650905 | 0.73969107 |
| Ba | 0.73862270 | 0.19893395 | 0.26137730 |
| Ba | 0.73372311 | 0.46271674 | 0.26799511 |
| Ba | 0.73862270 | 0.19893395 | 0.73862270 |
| Ba | 0.73421516 | 0.46303650 | 0.73731209 |
| Ce | 0.00004291 | 0.99930001 | 0.00000541 |
| Ce | 0.00000000 | 0.26933094 | 0.00000000 |
| Ce | 1.00001148 | 0.99865840 | 0.49998779 |
| Ce | 0.00000000 | 0.26933094 | 0.50000000 |
| Ce | 0.00003391 | 0.13356781 | 0.00000462 |
| Ce | 0.99957080 | 0.40683707 | 0.00083534 |
| Ce | 0.00001586 | 0.13325619 | 0.49998327 |
| Ce | 0.00043428 | 0.40768981 | 0.50111262 |
| Ce | 0.50002305 | 0.99865982 | 0.99997975 |
| Ce | 0.50000000 | 0.26933094 | 0.00000000 |
| Ce | 0.50001093 | 0.00442136 | 0.49997976 |
| Ce | 0.50000000 | 0.26933094 | 0.50000000 |
| Ce | 0.50000413 | 0.13325595 | 0.99999254 |
| Ce | 0.49991036 | 0.40769789 | 0.00072091 |
| Fe | 0.50002709 | 0.13491330 | 0.50000251 |
| Fe | 0.50138385 | 0.39864446 | 0.50149111 |
| O  | 0.49919969 | 0.52092736 | 0.50039715 |
| O  | 0.00611041 | 0.51329985 | 0.00390704 |
| O  | 0.00038123 | 0.06495189 | 0.00026087 |
| O  | 0.99316385 | 0.34007896 | 0.99778917 |
| O  | 0.00003462 | 0.00146794 | 0.74739068 |
| O  | 0.00000000 | 0.26933094 | 0.74718398 |
| O  | 0.00021991 | 0.13556360 | 0.25232645 |

|   |            |            |            |
|---|------------|------------|------------|
| O | 0.99866861 | 0.41115432 | 0.24904049 |
| O | 0.99985626 | 0.13547758 | 0.74766356 |
| O | 0.00017433 | 0.41256520 | 0.75265054 |
| O | 0.50005294 | 0.00806492 | 0.25134691 |
| O | 0.50000000 | 0.26933094 | 0.25378416 |
| O | 0.50002948 | 0.00805054 | 0.74860779 |
| O | 0.50000000 | 0.26933094 | 0.74621584 |
| O | 0.49995490 | 0.13521010 | 0.27000275 |
| O | 0.50145239 | 0.40637228 | 0.27394121 |
| O | 0.50012605 | 0.13521440 | 0.72998659 |
| O | 0.50067928 | 0.40590967 | 0.72805829 |
| O | 0.25264461 | 0.00134363 | 0.99998360 |
| O | 0.25281602 | 0.26933094 | 0.00000000 |
| O | 0.25138385 | 0.00806556 | 0.49997973 |
| O | 0.25378416 | 0.26933094 | 0.50000000 |
| O | 0.25235217 | 0.13556461 | 0.99978737 |
| O | 0.24787064 | 0.41015624 | 0.00281627 |
| O | 0.99996563 | 0.06556838 | 0.49976455 |
| O | 0.00035215 | 0.34005096 | 0.50240890 |
| O | 0.27003890 | 0.13520474 | 0.50009044 |
| O | 0.27386009 | 0.40558578 | 0.50117388 |
| O | 0.74743939 | 0.00147650 | 0.99996459 |
| O | 0.74718398 | 0.26933094 | 0.00000000 |
| O | 0.74864457 | 0.00804894 | 0.50000810 |
| O | 0.74621584 | 0.26933094 | 0.50000000 |
| O | 0.74769105 | 0.13546499 | 0.00015490 |
| O | 0.75151057 | 0.41347334 | 0.00139978 |
| O | 0.73001951 | 0.13521819 | 0.49991775 |
| O | 0.72797244 | 0.40670570 | 0.50193908 |
| O | 0.00000000 | 0.20123977 | 0.00000000 |
| O | 0.99704970 | 0.48361910 | 0.99523031 |
| O | 0.00000000 | 0.20097902 | 0.50000000 |
| O | 0.00814181 | 0.47357553 | 0.49685911 |
| O | 0.49978541 | 0.06556825 | 0.99993696 |
| O | 0.50347918 | 0.34004752 | 0.00178306 |
| O | 0.50006201 | 0.07326243 | 0.50001204 |
| O | 0.50070224 | 0.34121175 | 0.49972726 |
| O | 0.50000000 | 0.20097902 | 0.00000000 |
| O | 0.49473933 | 0.47358877 | 0.99709537 |
| O | 0.50000000 | 0.19546987 | 0.50000000 |

|   |            |            |            |
|---|------------|------------|------------|
| O | 0.49963059 | 0.49092244 | 0.49869099 |
| H | 1.00000669 | 0.00135259 | 0.25260044 |
| H | 0.00000000 | 0.26933094 | 0.25281602 |

### S3.3: 1 oxygen vacancy, deprotonated

K-point grid: 2 1 2

79 ions

|                    |                      |                     |
|--------------------|----------------------|---------------------|
| 8.7570569223000003 | 0.0000000000000000   | 0.0000000000000000  |
| 0.0000000000000000 | -32.5141138445999971 | 0.0000000000000000  |
| 0.0000000000000000 | 0.0000000000000000   | -8.7570569223000003 |

|    |            |            |            |
|----|------------|------------|------------|
| Ba | 0.26097094 | 0.06812936 | 0.26097094 |
| Ba | 0.26898059 | 0.33676001 | 0.26898059 |
| Ba | 0.26097094 | 0.06812936 | 0.73902906 |
| Ba | 0.26898059 | 0.33676001 | 0.73101941 |
| Ba | 0.26137730 | 0.19893395 | 0.26137730 |
| Ba | 0.28013145 | 0.46220180 | 0.28013145 |
| Ba | 0.26137730 | 0.19893395 | 0.73862270 |
| Ba | 0.28013145 | 0.46220180 | 0.71986855 |
| Ba | 0.73902906 | 0.06812936 | 0.26097094 |
| Ba | 0.73101941 | 0.33676001 | 0.26898059 |
| Ba | 0.73902906 | 0.06812936 | 0.73902906 |
| Ba | 0.73101941 | 0.33676001 | 0.73101941 |
| Ba | 0.73862270 | 0.19893395 | 0.26137730 |
| Ba | 0.71986855 | 0.46220180 | 0.28013145 |
| Ba | 0.73862270 | 0.19893395 | 0.73862270 |
| Ba | 0.71986855 | 0.46220180 | 0.71986855 |
| Ce | 0.00000000 | 0.99934337 | 0.00000000 |
| Ce | 0.00000000 | 0.26933094 | 0.00000000 |
| Ce | 0.00000000 | 0.99883922 | 0.50000000 |
| Ce | 0.00000000 | 0.26933094 | 0.50000000 |
| Ce | 0.00000000 | 0.13367755 | 0.00000000 |
| Ce | 0.00000000 | 0.40456042 | 0.00000000 |
| Ce | 0.00000000 | 0.13347666 | 0.50000000 |
| Ce | 0.00000000 | 0.40896519 | 0.50000000 |
| Ce | 0.50000000 | 0.99883922 | 0.00000000 |
| Ce | 0.50000000 | 0.26933094 | 0.00000000 |
| Ce | 0.50000000 | 0.00498121 | 0.50000000 |
| Ce | 0.50000000 | 0.26933094 | 0.50000000 |

|    |            |            |            |
|----|------------|------------|------------|
| Ce | 0.50000000 | 0.13347666 | 0.00000000 |
| Ce | 0.50000000 | 0.40896519 | 0.00000000 |
| Fe | 0.50000000 | 0.13561495 | 0.50000000 |
| Fe | 0.50000000 | 0.40323198 | 0.50000000 |
| O  | 0.00000000 | 0.06496248 | 0.00000000 |
| O  | 0.00000000 | 0.33979591 | 0.00000000 |
| O  | 0.00000000 | 0.00145805 | 0.74732490 |
| O  | 0.00000000 | 0.26933094 | 0.74718398 |
| O  | 0.00000000 | 0.13529212 | 0.25237344 |
| O  | 0.00000000 | 0.41927997 | 0.24355084 |
| O  | 0.00000000 | 0.13529212 | 0.74762656 |
| O  | 0.00000000 | 0.41927997 | 0.75644916 |
| O  | 0.50000000 | 0.00840464 | 0.25142487 |
| O  | 0.50000000 | 0.26933094 | 0.25378416 |
| O  | 0.50000000 | 0.00840464 | 0.74857513 |
| O  | 0.50000000 | 0.26933094 | 0.74621584 |
| O  | 0.50000000 | 0.13596903 | 0.27054061 |
| O  | 0.50000000 | 0.40387583 | 0.26741739 |
| O  | 0.50000000 | 0.13596903 | 0.72945939 |
| O  | 0.50000000 | 0.40387583 | 0.73258261 |
| O  | 0.25267510 | 0.00145805 | 0.00000000 |
| O  | 0.25281602 | 0.26933094 | 0.00000000 |
| O  | 0.25142487 | 0.00840464 | 0.50000000 |
| O  | 0.25378416 | 0.26933094 | 0.50000000 |
| O  | 0.25237344 | 0.13529212 | 0.00000000 |
| O  | 0.24355084 | 0.41927997 | 0.00000000 |
| O  | 0.00000000 | 0.06576516 | 0.50000000 |
| O  | 0.00000000 | 0.34075267 | 0.50000000 |
| O  | 0.27054061 | 0.13596903 | 0.50000000 |
| O  | 0.26741739 | 0.40387583 | 0.50000000 |
| O  | 0.74732490 | 0.00145805 | 0.00000000 |
| O  | 0.74718398 | 0.26933094 | 0.00000000 |
| O  | 0.74857513 | 0.00840464 | 0.50000000 |
| O  | 0.74621584 | 0.26933094 | 0.50000000 |
| O  | 0.74762656 | 0.13529212 | 0.00000000 |
| O  | 0.75644916 | 0.41927997 | 0.00000000 |
| O  | 0.72945939 | 0.13596903 | 0.50000000 |
| O  | 0.73258261 | 0.40387583 | 0.50000000 |
| O  | 0.00000000 | 0.20123977 | 0.00000000 |
| O  | 0.00000000 | 0.20097902 | 0.50000000 |

|   |            |            |            |
|---|------------|------------|------------|
| O | 0.00000000 | 0.47463043 | 0.50000000 |
| O | 0.50000000 | 0.06576516 | 0.00000000 |
| O | 0.50000000 | 0.34075267 | 0.00000000 |
| O | 0.50000000 | 0.07397184 | 0.50000000 |
| O | 0.50000000 | 0.34139021 | 0.50000000 |
| O | 0.50000000 | 0.20097902 | 0.00000000 |
| O | 0.50000000 | 0.47463043 | 0.00000000 |
| O | 0.50000000 | 0.19800601 | 0.50000000 |
| O | 0.50000000 | 0.46626182 | 0.50000000 |
| O | 0.00000000 | 0.00145805 | 0.25267510 |
| O | 0.00000000 | 0.26933094 | 0.25281602 |

### S3.4: 1 oxygen vacancy, protonated

K-point grid: 2 1 2

81 ions

|                    |                      |                     |
|--------------------|----------------------|---------------------|
| 8.7570569223000003 | 0.0000000000000000   | 0.0000000000000000  |
| 0.0000000000000000 | -32.5141138445999971 | 0.0000000000000000  |
| 0.0000000000000000 | 0.0000000000000000   | -8.7570569223000003 |

|    |             |            |             |
|----|-------------|------------|-------------|
| Ba | 0.26129695  | 0.06811192 | 0.26122195  |
| Ba | 0.26015838  | 0.33402531 | 0.26399023  |
| Ba | 0.26138477  | 0.06810511 | 0.73861660  |
| Ba | 0.27688267  | 0.33863793 | 0.72914215  |
| Ba | 0.26137730  | 0.19893395 | 0.26137730  |
| Ba | 0.28540916  | 0.46511751 | 0.26173671  |
| Ba | 0.26137730  | 0.19893395 | 0.73862270  |
| Ba | 0.26964600  | 0.46256501 | 0.72561247  |
| Ba | 0.73871927  | 0.06811449 | 0.26120317  |
| Ba | 0.74092480  | 0.33296436 | 0.26030248  |
| Ba | 0.73863767  | 0.06810365 | 0.73864048  |
| Ba | 0.72392386  | 0.33764651 | 0.73090683  |
| Ba | 0.73862270  | 0.19893395 | 0.26137730  |
| Ba | 0.71261466  | 0.46566828 | 0.26040392  |
| Ba | 0.73862270  | 0.19893395 | 0.73862270  |
| Ba | 0.72974778  | 0.46330191 | 0.72294782  |
| Ce | -0.00000472 | 0.99918636 | -0.00001534 |
| Ce | 0.00000000  | 0.26933094 | 0.00000000  |
| Ce | 0.00001072  | 0.99874023 | 0.49993075  |
| Ce | 0.00000000  | 0.26933094 | 0.50000000  |

|    |             |            |             |
|----|-------------|------------|-------------|
| Ce | -0.00000426 | 0.13338504 | -0.00000531 |
| Ce | -0.00214273 | 0.40598169 | 0.00509659  |
| Ce | 0.00000239  | 0.13333230 | 0.49993122  |
| Ce | -0.00115839 | 0.40801925 | 0.48976052  |
| Ce | 0.50000588  | 0.99873468 | -0.00009358 |
| Ce | 0.50000000  | 0.26933094 | 0.00000000  |
| Ce | 0.50001169  | 0.00498800 | 0.49990313  |
| Ce | 0.50000000  | 0.26933094 | 0.50000000  |
| Ce | 0.50000942  | 0.13333413 | -0.00006150 |
| Ce | 0.50084318  | 0.40850152 | 0.00102493  |
| Fe | 0.50001176  | 0.13565380 | 0.49989170  |
| Fe | 0.50036708  | 0.40008200 | 0.49576968  |
| O  | 0.49729597  | 0.52278576 | 0.50165721  |
| O  | 0.00059664  | 0.50942414 | 0.48829846  |
| O  | -0.00013503 | 0.06484126 | 0.00063967  |
| O  | -0.01018757 | 0.34140647 | 0.04633586  |
| O  | 0.00000632  | 0.00149591 | 0.74732537  |
| O  | 0.00000000  | 0.26933094 | 0.74718398  |
| O  | -0.00001946 | 0.13573277 | 0.25201567  |
| O  | -0.00074632 | 0.43429348 | 0.24548642  |
| O  | -0.00000943 | 0.13550902 | 0.74791174  |
| O  | -0.00130965 | 0.41450927 | 0.74689537  |
| O  | 0.49999855  | 0.00845170 | 0.25118451  |
| O  | 0.50000000  | 0.26933094 | 0.25378416  |
| O  | 0.50000221  | 0.00839206 | 0.74860952  |
| O  | 0.50000000  | 0.26933094 | 0.74621584  |
| O  | 0.50001925  | 0.13621558 | 0.26941295  |
| O  | 0.50025348  | 0.40375837 | 0.26858889  |
| O  | 0.50001319  | 0.13628151 | 0.73041904  |
| O  | 0.50077755  | 0.40790293 | 0.72912606  |
| O  | 0.25260474  | 0.00139555 | -0.00009197 |
| O  | 0.25281602  | 0.26933094 | 0.00000000  |
| O  | 0.25127299  | 0.00842330 | 0.49994714  |
| O  | 0.25378416  | 0.26933094 | 0.50000000  |
| O  | 0.25204463  | 0.13561351 | -0.00000269 |
| O  | 0.24433434  | 0.41713082 | -0.00864731 |
| O  | 0.00005143  | 0.06567561 | 0.49939613  |
| O  | 0.00183488  | 0.34145687 | 0.47094667  |
| O  | 0.26949161  | 0.13626068 | 0.49986831  |
| O  | 0.26641787  | 0.40740478 | 0.49454285  |

|   |            |            |             |
|---|------------|------------|-------------|
| O | 0.74739427 | 0.00134510 | -0.00009363 |
| O | 0.74718398 | 0.26933094 | 0.00000000  |
| O | 0.74875188 | 0.00843214 | 0.49994434  |
| O | 0.74621584 | 0.26933094 | 0.50000000  |
| O | 0.74795955 | 0.13565658 | 0.00000429  |
| O | 0.75547535 | 0.42287417 | -0.00787796 |
| O | 0.73052155 | 0.13624907 | 0.49986622  |
| O | 0.73255832 | 0.40781444 | 0.49340269  |
| O | 0.00000000 | 0.20123976 | 0.00000000  |
| O | 0.00000000 | 0.20097902 | 0.50000000  |
| O | 0.00018583 | 0.48579308 | 0.55690905  |
| O | 0.50011084 | 0.06567980 | -0.00030387 |
| O | 0.50725010 | 0.34071199 | -0.01869259 |
| O | 0.49998784 | 0.07402215 | 0.50003856  |
| O | 0.49894240 | 0.34126430 | 0.50739618  |
| O | 0.50000000 | 0.20097902 | 0.00000000  |
| O | 0.49241131 | 0.47496887 | 0.04272925  |
| O | 0.50003749 | 0.19890435 | 0.49967580  |
| O | 0.49730926 | 0.49273639 | 0.50525018  |
| H | 0.00001063 | 0.00122264 | 0.25260102  |
| H | 0.00000000 | 0.26933094 | 0.25281602  |

### S3.5: 2 oxygen vacancy, deprotonated

K-point grid: 2 1 2

78 ions

|    |                    |                      |                     |
|----|--------------------|----------------------|---------------------|
|    | 8.7570569223000003 | 0.0000000000000000   | 0.0000000000000000  |
|    | 0.0000000000000000 | -32.5141138445999971 | 0.0000000000000000  |
|    | 0.0000000000000000 | 0.0000000000000000   | -8.7570569223000003 |
| Ba | 0.26110073         | 0.06805989           | 0.26112976          |
| Ba | 0.26694041         | 0.33586893           | 0.27230364          |
| Ba | 0.26110073         | 0.06805989           | 0.73887024          |
| Ba | 0.26694041         | 0.33586893           | 0.72769636          |
| Ba | 0.26137730         | 0.19893395           | 0.26137730          |
| Ba | 0.27109458         | 0.46320797           | 0.29161503          |
| Ba | 0.26137730         | 0.19893395           | 0.73862270          |
| Ba | 0.27109458         | 0.46320797           | 0.70838497          |
| Ba | 0.73889927         | 0.06805989           | 0.26112976          |
| Ba | 0.73305959         | 0.33586893           | 0.27230364          |
| Ba | 0.73889927         | 0.06805989           | 0.73887024          |

|    |            |            |            |
|----|------------|------------|------------|
| Ba | 0.73305959 | 0.33586893 | 0.72769636 |
| Ba | 0.73862270 | 0.19893395 | 0.26137730 |
| Ba | 0.72890542 | 0.46320797 | 0.29161503 |
| Ba | 0.73862270 | 0.19893395 | 0.73862270 |
| Ba | 0.72890542 | 0.46320797 | 0.70838497 |
| Ce | 0.00000000 | 0.99922296 | 0.00000000 |
| Ce | 0.00000000 | 0.26933094 | 0.00000000 |
| Ce | 0.00000000 | 0.99874026 | 0.50000000 |
| Ce | 0.00000000 | 0.26933094 | 0.50000000 |
| Ce | 0.00000000 | 0.13345462 | 0.00000000 |
| Ce | 0.00000000 | 0.40798627 | 0.00000000 |
| Ce | 0.00000000 | 0.13333993 | 0.50000000 |
| Ce | 0.00000000 | 0.40681584 | 0.50000000 |
| Ce | 0.50000000 | 0.99872601 | 0.00000000 |
| Ce | 0.50000000 | 0.26933094 | 0.00000000 |
| Ce | 0.50000000 | 0.00496108 | 0.50000000 |
| Ce | 0.50000000 | 0.26933094 | 0.50000000 |
| Ce | 0.50000000 | 0.13330824 | 0.00000000 |
| Ce | 0.50000000 | 0.40729606 | 0.00000000 |
| Fe | 0.50000000 | 0.13563085 | 0.50000000 |
| Fe | 0.50000000 | 0.40401368 | 0.50000000 |
| O  | 0.00000000 | 0.06488720 | 0.00000000 |
| O  | 0.00000000 | 0.34252321 | 0.00000000 |
| O  | 0.00000000 | 0.00143628 | 0.74735780 |
| O  | 0.00000000 | 0.26933094 | 0.74718398 |
| O  | 0.00000000 | 0.13561590 | 0.25210504 |
| O  | 0.00000000 | 0.41592089 | 0.24474513 |
| O  | 0.00000000 | 0.13561590 | 0.74789496 |
| O  | 0.00000000 | 0.41592089 | 0.75525487 |
| O  | 0.50000000 | 0.00841008 | 0.25134056 |
| O  | 0.50000000 | 0.26933094 | 0.25378416 |
| O  | 0.50000000 | 0.00841008 | 0.74865944 |
| O  | 0.50000000 | 0.26933094 | 0.74621584 |
| O  | 0.50000000 | 0.13618859 | 0.26973239 |
| O  | 0.50000000 | 0.40633510 | 0.26151949 |
| O  | 0.50000000 | 0.13618859 | 0.73026761 |
| O  | 0.50000000 | 0.40633510 | 0.73848051 |
| O  | 0.25264163 | 0.00143216 | 0.00000000 |
| O  | 0.25281602 | 0.26933094 | 0.00000000 |
| O  | 0.25134118 | 0.00841970 | 0.50000000 |



|   |            |            |            |
|---|------------|------------|------------|
| O | 0.25378416 | 0.26933094 | 0.50000000 |
| O | 0.25213024 | 0.13563158 | 0.00000000 |
| O | 0.25415933 | 0.43251084 | 0.00000000 |
| O | 0.00000000 | 0.06567350 | 0.50000000 |
| O | 0.00000000 | 0.33936874 | 0.50000000 |
| O | 0.26977505 | 0.13619379 | 0.50000000 |
| O | 0.26614184 | 0.40339276 | 0.50000000 |
| O | 0.74735837 | 0.00143216 | 0.00000000 |
| O | 0.74718398 | 0.26933094 | 0.00000000 |
| O | 0.74865882 | 0.00841970 | 0.50000000 |
| O | 0.74621584 | 0.26933094 | 0.50000000 |
| O | 0.74786976 | 0.13563158 | 0.00000000 |
| O | 0.74584067 | 0.43251084 | 0.00000000 |
| O | 0.73022495 | 0.13619379 | 0.50000000 |
| O | 0.73385816 | 0.40339276 | 0.50000000 |
| O | 0.00000000 | 0.20123977 | 0.00000000 |
| O | 0.00000000 | 0.20097902 | 0.50000000 |
| O | 0.00000000 | 0.47377947 | 0.50000000 |
| O | 0.50000000 | 0.06566351 | 0.00000000 |
| O | 0.50000000 | 0.34152627 | 0.00000000 |
| O | 0.50000000 | 0.07399727 | 0.50000000 |
| O | 0.50000000 | 0.34139011 | 0.50000000 |
| O | 0.50000000 | 0.20097902 | 0.00000000 |
| O | 0.50000000 | 0.19870356 | 0.50000000 |
| O | 0.50000000 | 0.46778848 | 0.50000000 |
| O | 0.00000000 | 0.00143628 | 0.25264220 |
| O | 0.00000000 | 0.26933094 | 0.25281602 |

### S3.6: 2 oxygen vacancies, protonated

K-point grid: 2 1 2

80 ions

|                    |                      |                     |
|--------------------|----------------------|---------------------|
| 8.7570569223000003 | 0.0000000000000000   | 0.0000000000000000  |
| 0.0000000000000000 | -32.5141138445999971 | 0.0000000000000000  |
| 0.0000000000000000 | 0.0000000000000000   | -8.7570569223000003 |

|    |            |            |            |
|----|------------|------------|------------|
| Ba | 0.26292905 | 0.06464617 | 0.26462871 |
| Ba | 0.25596330 | 0.32959076 | 0.25514771 |
| Ba | 0.26343808 | 0.06618207 | 0.74324081 |
| Ba | 0.27436182 | 0.33630820 | 0.72468822 |

|    |             |             |             |
|----|-------------|-------------|-------------|
| Ba | 0.26352872  | 0.19133053  | 0.27850383  |
| Ba | 0.27477178  | 0.46509275  | 0.27598900  |
| Ba | 0.26137730  | 0.19893395  | 0.73862270  |
| Ba | 0.26793300  | 0.46416524  | 0.71702368  |
| Ba | 0.73889927  | 0.06805989  | 0.26112976  |
| Ba | 0.74366945  | 0.32972056  | 0.25535153  |
| Ba | 0.74029969  | 0.06812830  | 0.73959533  |
| Ba | 0.72560336  | 0.33614919  | 0.72516343  |
| Ba | 0.72643206  | 0.19245278  | 0.27289030  |
| Ba | 0.72533901  | 0.46511628  | 0.27595122  |
| Ba | 0.73862270  | 0.19893395  | 0.73862270  |
| Ba | 0.73204652  | 0.46413771  | 0.71697447  |
| Ce | 0.00000000  | 0.99922296  | 0.00000000  |
| Ce | -0.00007783 | 0.26687113  | 0.00067233  |
| Ce | 0.00217467  | 0.99831768  | 0.50544432  |
| Ce | 0.00000000  | 0.26933094  | 0.50000000  |
| Ce | -0.00131988 | 0.13249411  | 0.00060733  |
| Ce | 0.00000000  | 0.40798627  | 0.00000000  |
| Ce | 0.00033884  | 0.13205217  | 0.50779612  |
| Ce | 0.00001315  | 0.40661259  | 0.49058800  |
| Ce | 0.50278610  | 0.99777424  | 0.00380948  |
| Ce | 0.49969376  | 0.26696737  | 0.00015106  |
| Ce | 0.50322635  | 0.00359832  | 0.50417703  |
| Ce | 0.50000000  | 0.26933094  | 0.50000000  |
| Ce | 0.50043335  | 0.13216078  | -0.00109521 |
| Ce | 0.50000000  | 0.40729606  | 0.00000000  |
| Fe | 0.49976064  | 0.13346274  | 0.50617534  |
| Fe | 0.50006709  | 0.40094049  | 0.49579361  |
| O  | 0.00003155  | 0.51305868  | 0.49034429  |
| O  | 0.50004509  | 0.52395239  | 0.50293652  |
| O  | -0.01688416 | 0.06466694  | 0.96292974  |
| O  | -0.00010129 | 0.34305157  | 0.03773121  |
| O  | 0.01060050  | -0.00995945 | 0.75083041  |
| O  | 0.00000000  | 0.26933094  | 0.74718398  |
| O  | 0.03456899  | 0.12865827  | 0.25543904  |
| O  | 0.00004356  | 0.43159858  | 0.24595897  |
| O  | 0.95625450  | 0.13990823  | 0.75242584  |
| O  | 0.00009033  | 0.41606791  | 0.74717008  |
| O  | 0.50671861  | 0.00579669  | 0.25478650  |
| O  | 0.50000000  | 0.26933094  | 0.25378416  |

|   |             |             |             |
|---|-------------|-------------|-------------|
| O | 0.49729945  | 0.00711549  | 0.75373732  |
| O | 0.50000000  | 0.26933094  | 0.74621584  |
| O | 0.48112464  | 0.13449359  | 0.26937412  |
| O | 0.50012461  | 0.40966545  | 0.26370833  |
| O | 0.52127236  | 0.13432687  | 0.73521985  |
| O | 0.50002062  | 0.40807883  | 0.73292217  |
| O | 0.25348560  | 0.00646647  | 0.01036251  |
| O | 0.25281602  | 0.26933094  | 0.00000000  |
| O | 0.25323160  | 0.00569804  | 0.49685929  |
| O | 0.25378416  | 0.26933094  | 0.50000000  |
| O | 0.25055523  | 0.13289835  | -0.03548196 |
| O | 0.25206719  | 0.43054887  | 0.99684130  |
| O | 0.00913841  | 0.06499119  | 0.54256262  |
| O | 0.00037279  | 0.34047280  | 0.47864855  |
| O | 0.26705539  | 0.13578565  | 0.52530477  |
| O | 0.26633721  | 0.40747303  | 0.49515866  |
| O | 0.74982407  | -0.00404032 | 0.00165914  |
| O | 0.74718398  | 0.26933094  | 0.00000000  |
| O | 0.75256724  | 0.00854709  | 0.50804044  |
| O | 0.74621584  | 0.26933094  | 0.50000000  |
| O | 0.74868357  | 0.13566551  | 0.04460438  |
| O | 0.74796033  | 0.43057974  | 0.99685757  |
| O | 0.73326687  | 0.13283939  | 0.48462013  |
| O | 0.73372759  | 0.40743288  | 0.49506362  |
| O | 0.00000000  | 0.20123977  | 0.00000000  |
| O | 0.00000000  | 0.20097902  | 0.50000000  |
| O | -0.00002123 | 0.48641968  | 0.54147504  |
| O | 0.51853252  | 0.06499862  | 0.00709698  |
| O | 0.50015291  | 0.34131932  | 0.99234638  |
| O | 0.49670454  | 0.07229688  | 0.50292204  |
| O | 0.50001935  | 0.34085860  | 0.50478801  |
| O | 0.50000000  | 0.20097902  | 0.00000000  |
| O | 0.50072086  | 0.19762354  | 0.50376321  |
| O | 0.49999922  | 0.49390598  | 0.50362940  |
| H | -0.00157969 | 0.01008134  | 0.25521255  |
| H | 0.00000000  | 0.26933094  | 0.25281602  |

#### S4: BCF1585 Slabs

S4.1: No oxygen vacancies, deprotonated

K-point grid: 2 2 1

80 ions

```
11.2817173004000004  0.0000000000000000  0.0000000000000000
0.0000000000000000  7.9773788451999996  0.0000000000000000
0.0000000000000000  0.0000000000000000  26.2817173004000004
```

|    |            |            |            |
|----|------------|------------|------------|
| Ba | 0.00542702 | 0.75213573 | 0.10805084 |
| Ba | 0.49634216 | 0.76873579 | 0.32324218 |
| Ba | 0.25595474 | 0.75595474 | 0.21463051 |
| Ba | 0.75596636 | 0.74294451 | 0.99347723 |
| Ba | 0.00542702 | 0.24786427 | 0.10805084 |
| Ba | 0.49634216 | 0.23126421 | 0.32324218 |
| Ba | 0.25595474 | 0.24404526 | 0.21463051 |
| Ba | 0.75596636 | 0.25705549 | 0.99347723 |
| Ba | 0.74404520 | 0.75595474 | 0.21463051 |
| Ba | 0.24364208 | 0.73953083 | 0.99789236 |
| Ba | 0.99532728 | 0.76054419 | 0.33318104 |
| Ba | 0.50546954 | 0.73531941 | 0.11048958 |
| Ba | 0.74404520 | 0.24404526 | 0.21463051 |
| Ba | 0.24364208 | 0.26046917 | 0.99789236 |
| Ba | 0.99532728 | 0.23945581 | 0.33318104 |
| Ba | 0.50546954 | 0.26468059 | 0.11048958 |
| Fe | 0.99948329 | 0.00000000 | 0.01518874 |
| Fe | 0.50000000 | 0.00000000 | 0.21463051 |
| Fe | 0.26035869 | 0.00000000 | 0.11203231 |
| Fe | 0.76414712 | 0.00000000 | 0.33196798 |
| Fe | 0.99355179 | 0.50000000 | 0.99595689 |
| Fe | 0.50000000 | 0.50000000 | 0.21463051 |
| Fe | 0.25443847 | 0.50000000 | 0.10441728 |
| Fe | 0.73415330 | 0.50000000 | 0.31406915 |
| Fe | 0.75074632 | 0.00000000 | 0.10885204 |
| Fe | 0.22520440 | 0.00000000 | 0.33592171 |
| Fe | 0.00000000 | 0.00000000 | 0.21463051 |
| Fe | 0.50109412 | 0.00000000 | 0.01748246 |
| Fe | 0.76520431 | 0.50000000 | 0.09814190 |
| Fe | 0.25744044 | 0.50000000 | 0.31668964 |
| Ce | 0.00000000 | 0.50000000 | 0.21463051 |
| Ce | 0.49949307 | 0.50000000 | 0.97798274 |
| O  | 0.99888029 | 0.80721051 | 0.98635729 |
| O  | 0.50000000 | 0.75208080 | 0.21463051 |

|   |            |            |            |
|---|------------|------------|------------|
| O | 0.25424373 | 0.75242335 | 0.10654329 |
| O | 0.74108060 | 0.69210816 | 0.34241887 |
| O | 0.99888029 | 0.19278949 | 0.98635729 |
| O | 0.50000000 | 0.24791920 | 0.21463051 |
| O | 0.25424373 | 0.24757665 | 0.10654329 |
| O | 0.74108060 | 0.30789184 | 0.34241887 |
| O | 0.75393794 | 0.74538554 | 0.10402574 |
| O | 0.25280037 | 0.69046549 | 0.34560816 |
| O | 0.00000000 | 0.77205044 | 0.21463051 |
| O | 0.50056454 | 0.80799695 | 0.98744003 |
| O | 0.75393794 | 0.25461446 | 0.10402574 |
| O | 0.25280037 | 0.30953451 | 0.34560816 |
| O | 0.00000000 | 0.22794956 | 0.21463051 |
| O | 0.50056454 | 0.19200305 | 0.98744003 |
| O | 0.13258446 | 0.00000000 | 0.04985002 |
| O | 0.61921624 | 0.00000000 | 0.26201877 |
| O | 0.37604040 | 0.00000000 | 0.16141950 |
| O | 0.87108934 | 0.00000000 | 0.37663201 |
| O | 0.13202667 | 0.50000000 | 0.05598224 |
| O | 0.60723059 | 0.50000000 | 0.27535414 |
| O | 0.37634283 | 0.50000000 | 0.16154932 |
| O | 0.88304749 | 0.50000000 | 0.95331828 |
| O | 0.87365711 | 0.00000000 | 0.16039647 |
| O | 0.35648822 | 0.00000000 | 0.36416412 |
| O | 0.13494597 | 0.00000000 | 0.27825148 |
| O | 0.63828907 | 0.00000000 | 0.04960883 |
| O | 0.86397487 | 0.50000000 | 0.15624020 |
| O | 0.34745943 | 0.50000000 | 0.94084923 |
| O | 0.12676440 | 0.50000000 | 0.28079756 |
| O | 0.64257610 | 0.50000000 | 0.05043757 |
| O | 0.86726301 | 0.00000000 | 0.05024676 |
| O | 0.38554641 | 0.00000000 | 0.26339903 |
| O | 0.12634283 | 0.00000000 | 0.16039647 |
| O | 0.63476632 | 0.00000000 | 0.36245174 |
| O | 0.88838945 | 0.50000000 | 0.05228813 |
| O | 0.37866100 | 0.50000000 | 0.27519479 |
| O | 0.13602522 | 0.50000000 | 0.15624020 |
| O | 0.64973814 | 0.50000000 | 0.93911203 |
| O | 0.62828103 | 0.00000000 | 0.15563999 |
| O | 0.11691059 | 0.00000000 | 0.37958088 |

|   |            |            |            |
|---|------------|------------|------------|
| O | 0.86597839 | 0.00000000 | 0.27605008 |
| O | 0.36807394 | 0.00000000 | 0.05276310 |
| O | 0.62080944 | 0.50000000 | 0.16910213 |
| O | 0.11156969 | 0.50000000 | 0.95832150 |
| O | 0.86604184 | 0.50000000 | 0.27838627 |
| O | 0.37218369 | 0.50000000 | 0.05319636 |

#### S4.2: No oxygen vacancies, protonated

K-point grid: 2 2 1

82 ions

```

11.2817173004000004  0.0000000000000000  0.0000000000000000
0.0000000000000000  7.9773788451999996  0.0000000000000000
0.0000000000000000  0.0000000000000000  26.2817173004000004

```

|    |            |             |            |
|----|------------|-------------|------------|
| H  | 0.31968052 | 0.01136879  | 0.40134054 |
| H  | 0.27957688 | 0.74702333  | 0.36630873 |
| Ba | 0.00405351 | 0.75150707  | 0.10784949 |
| Ba | 0.50351452 | 0.77130236  | 0.32101619 |
| Ba | 0.25595474 | 0.75595474  | 0.21463051 |
| Ba | 0.72495311 | 0.75481809  | 0.99448438 |
| Ba | 0.00429741 | 0.24570722  | 0.10700702 |
| Ba | 0.51958457 | 0.22647579  | 0.32440253 |
| Ba | 0.25595474 | 0.24404526  | 0.21463051 |
| Ba | 0.74857016 | 0.26190887  | 0.98236280 |
| Ba | 0.74404520 | 0.75595474  | 0.21463051 |
| Ba | 0.23345037 | 0.73646704  | 0.00117895 |
| Ba | 0.02139456 | 0.75810454  | 0.33140802 |
| Ba | 0.50691085 | 0.73316520  | 0.11042686 |
| Ba | 0.74404520 | 0.24404526  | 0.21463051 |
| Ba | 0.22198201 | 0.25525376  | 0.99182759 |
| Ba | 0.98360781 | 0.21970883  | 0.33571234 |
| Ba | 0.50751448 | 0.26156039  | 0.11084294 |
| Fe | 0.97510134 | -0.01271472 | 0.00968684 |
| Fe | 0.50000000 | 0.00000000  | 0.21463051 |
| Fe | 0.26415227 | 0.00126668  | 0.11299228 |
| Fe | 0.77559336 | -0.07269956 | 0.35619439 |
| Fe | 0.96150596 | 0.54709259  | 0.98734020 |
| Fe | 0.50000000 | 0.50000000  | 0.21463051 |
| Fe | 0.25735963 | 0.46702457  | 0.10595731 |

|    |            |             |            |
|----|------------|-------------|------------|
| Fe | 0.74679401 | 0.51433921  | 0.32213556 |
| Fe | 0.75134209 | 0.02701196  | 0.10914792 |
| Fe | 0.24549451 | 0.04003221  | 0.31918603 |
| Fe | 0.00000000 | 0.00000000  | 0.21463051 |
| Fe | 0.48727950 | 0.00424201  | 0.01650533 |
| Fe | 0.76565429 | 0.49079005  | 0.09451317 |
| Fe | 0.27024004 | 0.47118212  | 0.31147542 |
| Ce | 0.00000000 | 0.50000000  | 0.21463051 |
| Ce | 0.48502172 | 0.49024660  | 0.97879020 |
| O  | 0.97875204 | 0.76765375  | 0.99829336 |
| O  | 0.50000000 | 0.75208080  | 0.21463051 |
| O  | 0.25388051 | 0.77870425  | 0.10440793 |
| O  | 0.74524658 | 0.70853069  | 0.35328020 |
| O  | 0.97192140 | 0.13255791  | 0.96393037 |
| O  | 0.50000000 | 0.24791920  | 0.21463051 |
| O  | 0.24882237 | 0.24333021  | 0.10928917 |
| O  | 0.75623398 | 0.34418795  | 0.35877527 |
| O  | 0.75625855 | 0.71898366  | 0.09670489 |
| O  | 0.25579690 | 0.69994520  | 0.33343829 |
| O  | 0.00000000 | 0.77205044  | 0.21463051 |
| O  | 0.48260902 | 0.80017113  | 0.99291350 |
| O  | 0.74940460 | 0.25725014  | 0.10932989 |
| O  | 0.27253366 | 0.26097044  | 0.32717026 |
| O  | 0.00000000 | 0.22794956  | 0.21463051 |
| O  | 0.49138652 | 0.18313742  | 0.97992420 |
| O  | 0.10746449 | 0.01017721  | 0.04431560 |
| O  | 0.61166381 | -0.00020808 | 0.26277593 |
| O  | 0.37604040 | 0.00000000  | 0.16141950 |
| O  | 0.88827068 | -0.03947248 | 0.39603747 |
| O  | 0.14282023 | 0.49479643  | 0.05929089 |
| O  | 0.62518126 | 0.50461351  | 0.28033804 |
| O  | 0.37634283 | 0.50000000  | 0.16154932 |
| O  | 0.85526060 | 0.53144559  | 0.94344341 |
| O  | 0.87365711 | 0.00000000  | 0.16039647 |
| O  | 0.36775436 | -0.00758088 | 0.37094616 |
| O  | 0.11705855 | 0.00140263  | 0.27083831 |
| O  | 0.62342955 | 0.00955010  | 0.05039026 |
| O  | 0.86397487 | 0.50000000  | 0.15624020 |
| O  | 0.32920031 | 0.49916647  | 0.94295763 |
| O  | 0.12449172 | 0.48564886  | 0.28448383 |

|   |            |             |            |
|---|------------|-------------|------------|
| O | 0.63873038 | 0.48401258  | 0.04737582 |
| O | 0.85166023 | 0.01202002  | 0.05027461 |
| O | 0.37181525 | -0.00390981 | 0.26909112 |
| O | 0.12634283 | 0.00000000  | 0.16039647 |
| O | 0.64338645 | 0.00244655  | 0.37276524 |
| O | 0.88534888 | 0.46755234  | 0.04445338 |
| O | 0.39500800 | 0.49992232  | 0.27272565 |
| O | 0.13602522 | 0.50000000  | 0.15624020 |
| O | 0.62869123 | 0.50427519  | 0.93584902 |
| O | 0.62722376 | -0.00717551 | 0.15768086 |
| O | 0.14395256 | 0.00655845  | 0.36919653 |
| O | 0.84396112 | -0.02371902 | 0.29687593 |
| O | 0.35552302 | 0.02281827  | 0.05162193 |
| O | 0.62101938 | 0.49991344  | 0.17032672 |
| O | 0.08918760 | 0.49349688  | 0.96096929 |
| O | 0.86866957 | 0.50936317  | 0.28037977 |
| O | 0.37252292 | 0.48396507  | 0.05542713 |

#### S4.3: 1 oxygen vacancy, deprotonated

K-point grid: 2 2 1

79 ions

```

11.2817173004000004  0.0000000000000000  0.0000000000000000
0.0000000000000000  7.9773788451999996  0.0000000000000000
0.0000000000000000  0.0000000000000000  26.2817173004000004

```

|    |            |            |            |
|----|------------|------------|------------|
| Ba | 0.00423482 | 0.75225824 | 0.10784630 |
| Ba | 0.51015356 | 0.76331566 | 0.32350565 |
| Ba | 0.25595474 | 0.75595474 | 0.21463051 |
| Ba | 0.75222818 | 0.74306776 | 0.99444594 |
| Ba | 0.00423482 | 0.24774176 | 0.10784630 |
| Ba | 0.51015356 | 0.23668434 | 0.32350565 |
| Ba | 0.25595474 | 0.24404526 | 0.21463051 |
| Ba | 0.75222818 | 0.25693224 | 0.99444594 |
| Ba | 0.74404520 | 0.75595474 | 0.21463051 |
| Ba | 0.24042433 | 0.73973484 | 0.99773849 |
| Ba | 0.00539610 | 0.76152551 | 0.33596716 |
| Ba | 0.50429161 | 0.73556097 | 0.11064544 |
| Ba | 0.74404520 | 0.24404526 | 0.21463051 |
| Ba | 0.24042433 | 0.26026516 | 0.99773849 |



|    |            |            |            |
|----|------------|------------|------------|
| Ba | 0.00539610 | 0.23847449 | 0.33596716 |
| Ba | 0.50429161 | 0.26443903 | 0.11064544 |
| Fe | 0.99575465 | 0.00000000 | 0.01473227 |
| Fe | 0.50000000 | 0.00000000 | 0.21463051 |
| Fe | 0.26045314 | 0.00000000 | 0.11167852 |
| Fe | 0.77532322 | 0.00000000 | 0.34851587 |
| Fe | 0.98816541 | 0.50000000 | 0.99548225 |
| Fe | 0.50000000 | 0.50000000 | 0.21463051 |
| Fe | 0.25288210 | 0.50000000 | 0.10380862 |
| Fe | 0.74921480 | 0.50000000 | 0.32191717 |
| Fe | 0.74954698 | 0.00000000 | 0.10986017 |
| Fe | 0.23116134 | 0.00000000 | 0.31473797 |
| Fe | 0.00000000 | 0.00000000 | 0.21463051 |
| Fe | 0.49864281 | 0.00000000 | 0.01788169 |
| Fe | 0.76176413 | 0.50000000 | 0.09931691 |
| Fe | 0.26995764 | 0.50000000 | 0.31221286 |
| Ce | 0.00000000 | 0.50000000 | 0.21463051 |
| Ce | 0.49637616 | 0.50000000 | 0.97808221 |
| O  | 0.99500604 | 0.80742551 | 0.98586332 |
| O  | 0.50000000 | 0.75208080 | 0.21463051 |
| O  | 0.25318602 | 0.75207601 | 0.10651867 |
| O  | 0.75362810 | 0.68875309 | 0.35202251 |
| O  | 0.99500604 | 0.19257449 | 0.98586332 |
| O  | 0.50000000 | 0.24791920 | 0.21463051 |
| O  | 0.25318602 | 0.24792399 | 0.10651867 |
| O  | 0.75362810 | 0.31124691 | 0.35202251 |
| O  | 0.75142063 | 0.74628204 | 0.10548037 |
| O  | 0.26736676 | 0.70212466 | 0.33709914 |
| O  | 0.00000000 | 0.77205044 | 0.21463051 |
| O  | 0.49876794 | 0.80772383 | 0.98785508 |
| O  | 0.75142063 | 0.25371796 | 0.10548037 |
| O  | 0.26736676 | 0.29787534 | 0.33709914 |
| O  | 0.00000000 | 0.22794956 | 0.21463051 |
| O  | 0.49876794 | 0.19227617 | 0.98785508 |
| O  | 0.12905204 | 0.00000000 | 0.04951944 |
| O  | 0.60581363 | 0.00000000 | 0.26525838 |
| O  | 0.37604040 | 0.00000000 | 0.16141950 |
| O  | 0.88894889 | 0.00000000 | 0.38977585 |
| O  | 0.13034183 | 0.50000000 | 0.05620521 |
| O  | 0.62481637 | 0.50000000 | 0.28106897 |

|   |            |            |            |
|---|------------|------------|------------|
| O | 0.37634283 | 0.50000000 | 0.16154932 |
| O | 0.87788532 | 0.50000000 | 0.95292274 |
| O | 0.87365711 | 0.00000000 | 0.16039647 |
| O | 0.11016701 | 0.00000000 | 0.27064238 |
| O | 0.63392431 | 0.00000000 | 0.05175520 |
| O | 0.86397487 | 0.50000000 | 0.15624020 |
| O | 0.34411000 | 0.50000000 | 0.94087003 |
| O | 0.12957647 | 0.50000000 | 0.28167321 |
| O | 0.63935078 | 0.50000000 | 0.05119344 |
| O | 0.86451591 | 0.00000000 | 0.05067486 |
| O | 0.36651946 | 0.00000000 | 0.27900961 |
| O | 0.12634283 | 0.00000000 | 0.16039647 |
| O | 0.63642540 | 0.00000000 | 0.37081006 |
| O | 0.88471680 | 0.50000000 | 0.05231568 |
| O | 0.39549570 | 0.50000000 | 0.27295605 |
| O | 0.13602522 | 0.50000000 | 0.15624020 |
| O | 0.64664552 | 0.50000000 | 0.93937564 |
| O | 0.62408950 | 0.00000000 | 0.16025528 |
| O | 0.16248533 | 0.00000000 | 0.37135487 |
| O | 0.84929679 | 0.00000000 | 0.28949837 |
| O | 0.36543754 | 0.00000000 | 0.05290946 |
| O | 0.62291491 | 0.50000000 | 0.16997048 |
| O | 0.10753907 | 0.50000000 | 0.95876190 |
| O | 0.87484025 | 0.50000000 | 0.28261934 |
| O | 0.37030259 | 0.50000000 | 0.05300301 |

#### S4.4: 1 oxygen vacancy, protonated

K-point grid: 2 2 1

81 ions

|                     |                    |                     |
|---------------------|--------------------|---------------------|
| 11.2817173004000004 | 0.0000000000000000 | 0.0000000000000000  |
| 0.0000000000000000  | 7.9773788451999996 | 0.0000000000000000  |
| 0.0000000000000000  | 0.0000000000000000 | 26.2817173004000004 |

|    |            |            |            |
|----|------------|------------|------------|
| H  | 0.66742877 | 0.00187279 | 0.40299571 |
| H  | 0.34025924 | 0.46946827 | 0.40690304 |
| Ba | 0.00425574 | 0.75807843 | 0.10618471 |
| Ba | 0.47639936 | 0.75632130 | 0.32643468 |
| Ba | 0.25595474 | 0.75595474 | 0.21463051 |
| Ba | 0.73604030 | 0.74114251 | 0.97812060 |

|    |             |            |            |
|----|-------------|------------|------------|
| Ba | -0.00061368 | 0.24692520 | 0.10888326 |
| Ba | 0.50736513  | 0.24120826 | 0.32495445 |
| Ba | 0.25595474  | 0.24404526 | 0.21463051 |
| Ba | 0.72038781  | 0.24322761 | 0.98541977 |
| Ba | 0.74404520  | 0.75595474 | 0.21463051 |
| Ba | 0.23569251  | 0.73959752 | 0.99555570 |
| Ba | 0.99377567  | 0.76764292 | 0.32777633 |
| Ba | 0.50556250  | 0.73603211 | 0.11092733 |
| Ba | 0.74404520  | 0.24404526 | 0.21463051 |
| Ba | 0.22424699  | 0.26028112 | 0.00053323 |
| Ba | 0.96410161  | 0.23572029 | 0.32885637 |
| Ba | 0.50790415  | 0.26795862 | 0.10991165 |
| Fe | 0.94930682  | 0.03187739 | 0.00512833 |
| Fe | 0.50000000  | 0.00000000 | 0.21463051 |
| Fe | 0.26470159  | 0.99855515 | 0.11297393 |
| Fe | 0.74041655  | 0.95638911 | 0.32143830 |
| Fe | 0.95529184  | 0.46702171 | 0.98872333 |
| Fe | 0.50000000  | 0.50000000 | 0.21463051 |
| Fe | 0.25588374  | 0.52827305 | 0.10642373 |
| Fe | 0.72756526  | 0.51860503 | 0.31244942 |
| Fe | 0.74573131  | 0.97225526 | 0.10753223 |
| Fe | 0.23418908  | 0.01871722 | 0.31325849 |
| Fe | 0.00000000  | 0.00000000 | 0.21463051 |
| Fe | 0.48734809  | 0.99526473 | 0.01864414 |
| Fe | 0.76288300  | 0.51276841 | 0.09257572 |
| Fe | 0.25600808  | 0.44270701 | 0.32072162 |
| Ce | 0.00000000  | 0.50000000 | 0.21463051 |
| Ce | 0.48121370  | 0.50066994 | 0.97931540 |
| O  | 0.88133963  | 0.98813698 | 0.94956850 |
| O  | 0.50000000  | 0.75208080 | 0.21463051 |
| O  | 0.24710269  | 0.75575730 | 0.10914128 |
| O  | 0.72659466  | 0.73110665 | 0.32965223 |
| O  | 0.97483311  | 0.25347241 | 0.00631285 |
| O  | 0.50000000  | 0.24791920 | 0.21463051 |
| O  | 0.24594269  | 0.21919398 | 0.10311355 |
| O  | 0.73553309  | 0.33550174 | 0.34603502 |
| O  | 0.74345329  | 0.74114393 | 0.11033029 |
| O  | 0.37435140  | 0.48529457 | 0.37326428 |
| O  | 0.00000000  | 0.77205044 | 0.21463051 |
| O  | 0.48844477  | 0.81037872 | 0.98385803 |

|   |            |             |            |
|---|------------|-------------|------------|
| O | 0.75666007 | 0.28570670  | 0.09364640 |
| O | 0.23488905 | 0.22844021  | 0.33615467 |
| O | 0.00000000 | 0.22794956  | 0.21463051 |
| O | 0.48024292 | 0.19706303  | 0.99322475 |
| O | 0.08949370 | 0.96911744  | 0.02451990 |
| O | 0.61811418 | -0.00045092 | 0.27155335 |
| O | 0.37604040 | 0.00000000  | 0.16141950 |
| O | 0.84806170 | 0.99207872  | 0.36971145 |
| O | 0.14160674 | 0.50338740  | 0.05963208 |
| O | 0.59827484 | 0.50421097  | 0.27440703 |
| O | 0.37634283 | 0.50000000  | 0.16154932 |
| O | 0.85056454 | 0.47675334  | 0.94347379 |
| O | 0.87365711 | 0.00000000  | 0.16039647 |
| O | 0.10397306 | 0.00692312  | 0.27423684 |
| O | 0.62586256 | 0.99590866  | 0.05164400 |
| O | 0.86397487 | 0.50000000  | 0.15624020 |
| O | 0.32492752 | 0.48770347  | 0.94315339 |
| O | 0.12178811 | 0.49616846  | 0.28968795 |
| O | 0.63550338 | 0.51727819  | 0.04617425 |
| O | 0.85715842 | 0.96881668  | 0.05442119 |
| O | 0.36923973 | 0.00674704  | 0.27441405 |
| O | 0.12634283 | 0.00000000  | 0.16039647 |
| O | 0.61501164 | 0.99181010  | 0.37359024 |
| O | 0.88024401 | 0.55162523  | 0.04376398 |
| O | 0.36082618 | 0.50561438  | 0.27280549 |
| O | 0.13602522 | 0.50000000  | 0.15624020 |
| O | 0.61952805 | 0.49162716  | 0.93260572 |
| O | 0.62624507 | 0.00877751  | 0.15967544 |
| O | 0.23189843 | 0.83962233  | 0.34881176 |
| O | 0.86269797 | 0.00079235  | 0.27153258 |
| O | 0.35292306 | 0.98158958  | 0.05307933 |
| O | 0.61891220 | 0.49817385  | 0.16916675 |
| O | 0.07867765 | 0.53555887  | 0.96217056 |
| O | 0.86523985 | 0.50613170  | 0.27871588 |
| O | 0.37150531 | 0.51243079  | 0.05568079 |

#### S4.5: 2 oxygen vacancies, deprotonated

K-point grid: 2 2 1

78 ions

|                     |                    |                     |
|---------------------|--------------------|---------------------|
| 11.2817173004000004 | 0.0000000000000000 | 0.0000000000000000  |
| 0.0000000000000000  | 7.9773788451999996 | 0.0000000000000000  |
| 0.0000000000000000  | 0.0000000000000000 | 26.2817173004000004 |

|    |             |             |            |
|----|-------------|-------------|------------|
| Ba | -0.01029545 | 0.75384183  | 0.10074988 |
| Ba | 0.51444465  | 0.77459736  | 0.32123722 |
| Ba | 0.25595474  | 0.75595474  | 0.21463051 |
| Ba | 0.73990034  | 0.74490864  | 0.99005889 |
| Ba | 0.00763687  | 0.24279242  | 0.10841619 |
| Ba | 0.50441576  | 0.23921300  | 0.32251232 |
| Ba | 0.25595474  | 0.24404526  | 0.21463051 |
| Ba | 0.69777843  | 0.23369702  | 0.91561417 |
| Ba | 0.74404520  | 0.75595474  | 0.21463051 |
| Ba | 0.22258687  | 0.73630605  | 0.99685964 |
| Ba | 0.01849965  | 0.75422986  | 0.33650146 |
| Ba | 0.51251193  | 0.73778299  | 0.11010397 |
| Ba | 0.74404520  | 0.24404526  | 0.21463051 |
| Ba | 0.23366069  | 0.24745197  | 0.00189378 |
| Ba | 0.02543216  | 0.22451364  | 0.33671094 |
| Ba | 0.49763037  | 0.26563381  | 0.11053252 |
| Fe | 0.93839890  | 0.06627531  | 0.00192051 |
| Fe | 0.50000000  | 0.00000000  | 0.21463051 |
| Fe | 0.26629927  | -0.00691457 | 0.11359225 |
| Fe | 0.78428481  | -0.03995624 | 0.34851181 |
| Fe | 0.93060149  | 0.46452772  | 0.99257822 |
| Fe | 0.50000000  | 0.50000000  | 0.21463051 |
| Fe | 0.25468666  | 0.53291309  | 0.10604484 |
| Fe | 0.75873943  | 0.55526355  | 0.31644346 |
| Fe | 0.74139943  | 0.03604447  | 0.10618868 |
| Fe | 0.24148132  | -0.04621096 | 0.31550372 |
| Fe | 0.00000000  | 0.00000000  | 0.21463051 |
| Fe | 0.49662988  | 0.00367688  | 0.01635240 |
| Fe | 0.75196126  | 0.48626899  | 0.09654566 |
| Fe | 0.27620838  | 0.51609353  | 0.31362898 |
| Ce | 0.00000000  | 0.50000000  | 0.21463051 |
| Ce | 0.48505175  | 0.49970627  | 0.98266905 |
| O  | 0.85247204  | 0.01640681  | 0.95056236 |
| O  | 0.50000000  | 0.75208080  | 0.21463051 |
| O  | 0.24364101  | 0.76012147  | 0.10521120 |
| O  | 0.76370695  | 0.73381575  | 0.35258360 |

|   |             |             |            |
|---|-------------|-------------|------------|
| O | -0.00048888 | 0.26767682  | 0.99011746 |
| O | 0.50000000  | 0.24791920  | 0.21463051 |
| O | 0.24644729  | 0.21365315  | 0.10377040 |
| O | 0.74967605  | 0.71436109  | 0.09794831 |
| O | 0.27814004  | 0.73561292  | 0.32940174 |
| O | 0.00000000  | 0.77205044  | 0.21463051 |
| O | 0.49630801  | 0.80549695  | 0.98836032 |
| O | 0.73811956  | 0.25998934  | 0.11230005 |
| O | 0.27275506  | 0.33558511  | 0.34786566 |
| O | 0.00000000  | 0.22794956  | 0.21463051 |
| O | 0.49601780  | 0.18510170  | 0.97927007 |
| O | 0.07688545  | -0.01481900 | 0.01974594 |
| O | 0.60928310  | 0.00191383  | 0.26409509 |
| O | 0.37604040  | 0.00000000  | 0.16141950 |
| O | 0.89793328  | -0.00344918 | 0.38948932 |
| O | 0.14363039  | 0.49490964  | 0.05849068 |
| O | 0.63414348  | 0.49287176  | 0.28375223 |
| O | 0.37634283  | 0.50000000  | 0.16154932 |
| O | 0.83560475  | 0.45874936  | 0.94320384 |
| O | 0.87365711  | 0.00000000  | 0.16039647 |
| O | 0.12070152  | 0.00531482  | 0.27161662 |
| O | 0.62690036  | 0.00006152  | 0.05361786 |
| O | 0.86397487  | 0.50000000  | 0.15624020 |
| O | 0.32067521  | 0.49159406  | 0.94820962 |
| O | 0.14041533  | 0.50758225  | 0.27823893 |
| O | 0.62907818  | 0.48880961  | 0.04814116 |
| O | 0.85768779  | 0.00690804  | 0.05633790 |
| O | 0.37136369  | 0.00727509  | 0.27610222 |
| O | 0.12634283  | 0.00000000  | 0.16039647 |
| O | 0.64916771  | 0.03160635  | 0.36703254 |
| O | 0.87513842  | 0.46097600  | 0.05507467 |
| O | 0.40128195  | 0.50402484  | 0.27344098 |
| O | 0.13602522  | 0.50000000  | 0.15624020 |
| O | 0.60302501  | 0.51278689  | 0.92472456 |
| O | 0.62601250  | -0.00697869 | 0.15998987 |
| O | 0.17241308  | -0.00478180 | 0.37173321 |
| O | 0.85770440  | -0.00066636 | 0.28990073 |
| O | 0.35979146  | -0.00865439 | 0.05090105 |
| O | 0.62215481  | 0.50106680  | 0.17011477 |
| O | -0.00591296 | 0.65542073  | 0.98944749 |

|   |            |            |            |
|---|------------|------------|------------|
| O | 0.89385512 | 0.47734370 | 0.29696941 |
| O | 0.37195300 | 0.50988378 | 0.05697342 |

#### S4.6: 2 oxygen vacancies, protonated

K-point grid: 2 2 1

80 ions

|                     |                    |                     |
|---------------------|--------------------|---------------------|
| 11.2817173004000004 | 0.0000000000000000 | 0.0000000000000000  |
| 0.0000000000000000  | 7.9773788451999996 | 0.0000000000000000  |
| 0.0000000000000000  | 0.0000000000000000 | 26.2817173004000004 |

|    |            |            |            |
|----|------------|------------|------------|
| H  | 0.17797617 | 0.96502031 | 0.40534086 |
| H  | 0.64363004 | 0.47472278 | 0.40828194 |
| Ba | 0.99562175 | 0.75343065 | 0.10104817 |
| Ba | 0.51851207 | 0.76565697 | 0.32306047 |
| Ba | 0.25595474 | 0.75595474 | 0.21463051 |
| Ba | 0.73733795 | 0.74808728 | 0.99133962 |
| Ba | 0.99951657 | 0.24270840 | 0.10822828 |
| Ba | 0.49459997 | 0.24495473 | 0.32271893 |
| Ba | 0.25595474 | 0.24404526 | 0.21463051 |
| Ba | 0.70252879 | 0.24124590 | 0.91396384 |
| Ba | 0.74404520 | 0.75595474 | 0.21463051 |
| Ba | 0.22720410 | 0.74056846 | 0.99991896 |
| Ba | 0.99073111 | 0.75825439 | 0.32832675 |
| Ba | 0.50483142 | 0.73503004 | 0.10986323 |
| Ba | 0.74404520 | 0.24404526 | 0.21463051 |
| Ba | 0.22847136 | 0.25287998 | 0.99818602 |
| Ba | 0.02752788 | 0.25127549 | 0.33191504 |
| Ba | 0.50496348 | 0.26231341 | 0.11113097 |
| Fe | 0.93685527 | 0.06655606 | 0.00162438 |
| Fe | 0.50000000 | 0.00000000 | 0.21463051 |
| Fe | 0.26707553 | 0.00316316 | 0.11316100 |
| Fe | 0.75689857 | 0.08824548 | 0.35446472 |
| Fe | 0.93014650 | 0.47054858 | 0.99294514 |
| Fe | 0.50000000 | 0.50000000 | 0.21463051 |
| Fe | 0.25434745 | 0.46730409 | 0.10602132 |
| Fe | 0.74005764 | 0.46547736 | 0.32505298 |
| Fe | 0.74167740 | 0.03158388 | 0.10647252 |
| Fe | 0.23525293 | 0.94642765 | 0.31475153 |
| Fe | 0.00000000 | 0.00000000 | 0.21463051 |

|    |            |            |            |
|----|------------|------------|------------|
| Fe | 0.49737418 | 0.00748725 | 0.01624090 |
| Fe | 0.75068720 | 0.49030522 | 0.09740363 |
| Fe | 0.27136430 | 0.52355498 | 0.31651141 |
| Ce | 0.00000000 | 0.50000000 | 0.21463051 |
| Ce | 0.48550848 | 0.49552937 | 0.98294347 |
| O  | 0.85036997 | 0.01744678 | 0.95033632 |
| O  | 0.50000000 | 0.75208080 | 0.21463051 |
| O  | 0.24619517 | 0.78628164 | 0.10087226 |
| O  | 0.61438054 | 0.50464826 | 0.37465496 |
| O  | 0.99443708 | 0.27021691 | 0.98997128 |
| O  | 0.50000000 | 0.24791920 | 0.21463051 |
| O  | 0.24235533 | 0.23926941 | 0.10848303 |
| O  | 0.74789296 | 0.71771138 | 0.09952492 |
| O  | 0.27009839 | 0.73865447 | 0.33550697 |
| O  | 0.00000000 | 0.77205044 | 0.21463051 |
| O  | 0.48770789 | 0.80164092 | 0.99352974 |
| O  | 0.74155436 | 0.25762678 | 0.11223424 |
| O  | 0.26158524 | 0.33827503 | 0.34976837 |
| O  | 0.00000000 | 0.22794956 | 0.21463051 |
| O  | 0.50519784 | 0.18021229 | 0.97535373 |
| O  | 0.07658933 | 0.98920229 | 0.01855701 |
| O  | 0.60731941 | 0.00248453 | 0.26530159 |
| O  | 0.37604040 | 0.00000000 | 0.16141950 |
| O  | 0.79279616 | 0.29394156 | 0.36186611 |
| O  | 0.14220019 | 0.49252530 | 0.05830234 |
| O  | 0.63318350 | 0.50702668 | 0.27629644 |
| O  | 0.37634283 | 0.50000000 | 0.16154932 |
| O  | 0.83750976 | 0.46900837 | 0.94264333 |
| O  | 0.87365711 | 0.00000000 | 0.16039647 |
| O  | 0.10662467 | 0.00477356 | 0.27425476 |
| O  | 0.62652116 | 0.99837019 | 0.05415157 |
| O  | 0.86397487 | 0.50000000 | 0.15624020 |
| O  | 0.32137898 | 0.49501427 | 0.94786009 |
| O  | 0.13396281 | 0.51594279 | 0.28082202 |
| O  | 0.62856418 | 0.49073867 | 0.04871200 |
| O  | 0.85786539 | 0.00232564 | 0.05616616 |
| O  | 0.36182659 | 0.00289382 | 0.27702828 |
| O  | 0.12634283 | 0.00000000 | 0.16039647 |
| O  | 0.63127768 | 0.01228023 | 0.37857911 |
| O  | 0.87316953 | 0.46739240 | 0.05522415 |



|   |            |            |            |
|---|------------|------------|------------|
| O | 0.39179472 | 0.50604200 | 0.27367046 |
| O | 0.13602522 | 0.50000000 | 0.15624020 |
| O | 0.60350574 | 0.51768921 | 0.92527581 |
| O | 0.62499904 | 0.99050981 | 0.16026019 |
| O | 0.13075438 | 0.98127437 | 0.37483144 |
| O | 0.85158889 | 0.00284723 | 0.31080335 |
| O | 0.36163253 | 0.02727652 | 0.05123724 |
| O | 0.62120203 | 0.50090052 | 0.16844398 |
| O | 0.99743035 | 0.65847274 | 0.99058011 |
| O | 0.87173779 | 0.49686456 | 0.28655840 |
| O | 0.37097718 | 0.48092083 | 0.05646456 |

#### S4.7: 3 oxygen vacancies, deprotonated

K-point grid: 2 2 1

77 ions

```

11.2817173004000004  0.0000000000000000  0.0000000000000000
0.0000000000000000  7.9773788451999996  0.0000000000000000
0.0000000000000000  0.0000000000000000  26.2817173004000004

```

|    |            |            |            |
|----|------------|------------|------------|
| Ba | 0.98863874 | 0.75435876 | 0.10077033 |
| Ba | 0.51876664 | 0.77081592 | 0.32025028 |
| Ba | 0.25595474 | 0.75595474 | 0.21463051 |
| Ba | 0.73821013 | 0.74667858 | 0.99008523 |
| Ba | 0.00590430 | 0.24289968 | 0.10846673 |
| Ba | 0.49809244 | 0.23707985 | 0.32279392 |
| Ba | 0.25595474 | 0.24404526 | 0.21463051 |
| Ba | 0.69698575 | 0.23577029 | 0.91594184 |
| Ba | 0.74404520 | 0.75595474 | 0.21463051 |
| Ba | 0.22175218 | 0.73755494 | 0.99711408 |
| Ba | 0.00070557 | 0.77507859 | 0.33222071 |
| Ba | 0.51070056 | 0.73756507 | 0.11008079 |
| Ba | 0.74404520 | 0.24404526 | 0.21463051 |
| Ba | 0.23227728 | 0.24862647 | 0.00200557 |
| Ba | 0.03940559 | 0.24576099 | 0.33907740 |
| Ba | 0.49660790 | 0.26595472 | 0.11060220 |
| Fe | 0.93741206 | 0.06742115 | 0.00180015 |
| Fe | 0.50000000 | 0.00000000 | 0.21463051 |
| Fe | 0.26439893 | 0.99344166 | 0.11401710 |
| Fe | 0.77918440 | 0.01888178 | 0.32943991 |

|    |            |            |            |
|----|------------|------------|------------|
| Fe | 0.92909819 | 0.46640635 | 0.99289680 |
| Fe | 0.50000000 | 0.50000000 | 0.21463051 |
| Fe | 0.25366701 | 0.53064166 | 0.10594667 |
| Fe | 0.74234119 | 0.49619463 | 0.30340030 |
| Fe | 0.73955492 | 0.03634694 | 0.10585996 |
| Fe | 0.24022117 | 0.94935250 | 0.31688242 |
| Fe | 0.00000000 | 0.00000000 | 0.21463051 |
| Fe | 0.49452749 | 0.00432851 | 0.01669805 |
| Fe | 0.74954295 | 0.48686606 | 0.09676360 |
| Fe | 0.27247431 | 0.52212290 | 0.31674325 |
| Ce | 0.00000000 | 0.50000000 | 0.21463051 |
| Ce | 0.48366276 | 0.50023962 | 0.98269441 |
| O  | 0.85153175 | 0.01787125 | 0.95039385 |
| O  | 0.50000000 | 0.75208080 | 0.21463051 |
| O  | 0.24388229 | 0.75887874 | 0.10541501 |
| O  | 0.99787009 | 0.26941347 | 0.99027291 |
| O  | 0.50000000 | 0.24791920 | 0.21463051 |
| O  | 0.24487849 | 0.21483269 | 0.10408989 |
| O  | 0.74879542 | 0.71485122 | 0.09762595 |
| O  | 0.28188441 | 0.73787591 | 0.33143978 |
| O  | 0.00000000 | 0.77205044 | 0.21463051 |
| O  | 0.49371687 | 0.80576439 | 0.98896702 |
| O  | 0.73731857 | 0.25957784 | 0.11176392 |
| O  | 0.27072802 | 0.35314328 | 0.35597238 |
| O  | 0.00000000 | 0.22794956 | 0.21463051 |
| O  | 0.49418116 | 0.18536585 | 0.97947769 |
| O  | 0.07583277 | 0.98656592 | 0.01949209 |
| O  | 0.61291335 | 0.00288173 | 0.26476192 |
| O  | 0.37604040 | 0.00000000 | 0.16141950 |
| O  | 0.88706541 | 0.02694182 | 0.37429311 |
| O  | 0.14209854 | 0.49634271 | 0.05836997 |
| O  | 0.61465594 | 0.49602420 | 0.27038192 |
| O  | 0.37634283 | 0.50000000 | 0.16154932 |
| O  | 0.83488166 | 0.46119390 | 0.94324158 |
| O  | 0.87365711 | 0.00000000 | 0.16039647 |
| O  | 0.12422765 | 0.01124517 | 0.27219466 |
| O  | 0.62592546 | 0.00054135 | 0.05320874 |
| O  | 0.86397487 | 0.50000000 | 0.15624020 |
| O  | 0.31937362 | 0.49281426 | 0.94814083 |
| O  | 0.13951949 | 0.51128372 | 0.27953990 |

|   |            |            |            |
|---|------------|------------|------------|
| O | 0.62798374 | 0.48936292 | 0.04774509 |
| O | 0.85667179 | 0.00716778 | 0.05614635 |
| O | 0.37126582 | 0.00599437 | 0.27783445 |
| O | 0.12634283 | 0.00000000 | 0.16039647 |
| O | 0.64958085 | 0.01490662 | 0.36155354 |
| O | 0.87329377 | 0.46181111 | 0.05528401 |
| O | 0.39108115 | 0.49763891 | 0.27416548 |
| O | 0.13602522 | 0.50000000 | 0.15624020 |
| O | 0.60172336 | 0.51446282 | 0.92467461 |
| O | 0.62603758 | 0.99191131 | 0.15956923 |
| O | 0.16742209 | 0.99363000 | 0.37211357 |
| O | 0.86683700 | 0.99845912 | 0.27361929 |
| O | 0.35753466 | 0.99262444 | 0.05121148 |
| O | 0.61993348 | 0.50110716 | 0.16679623 |
| O | 0.99265069 | 0.65727323 | 0.99002031 |
| O | 0.89192515 | 0.49321523 | 0.30485158 |
| O | 0.37055675 | 0.50811067 | 0.05675783 |

#### S4.8: 3 oxygen vacancies, protonated

K-point grid: 2 2 1

79 ions

```

11.2817173004000004  0.0000000000000000  0.0000000000000000
0.0000000000000000  7.9773788451999996  0.0000000000000000
0.0000000000000000  0.0000000000000000  26.2817173004000004

```

|    |             |            |            |
|----|-------------|------------|------------|
| H  | 0.68167764  | 0.00433869 | 0.39789756 |
| H  | 0.24036963  | 0.24408718 | 0.36956615 |
| Ba | 0.98817968  | 0.75430035 | 0.10071876 |
| Ba | 0.50471429  | 0.76502949 | 0.32078806 |
| Ba | 0.25595474  | 0.75595474 | 0.21463051 |
| Ba | 0.73728621  | 0.74671391 | 0.99025214 |
| Ba | 0.00570969  | 0.24302126 | 0.10840972 |
| Ba | 0.49522826  | 0.24314657 | 0.32301645 |
| Ba | 0.25595474  | 0.24404526 | 0.21463051 |
| Ba | 0.69583871  | 0.23576075 | 0.91627730 |
| Ba | 0.74404520  | 0.75595474 | 0.21463051 |
| Ba | 0.22066500  | 0.73777165 | 0.99718912 |
| Ba | -0.00632856 | 0.77605906 | 0.33024105 |
| Ba | 0.51024136  | 0.73788200 | 0.11027503 |

|    |             |             |            |
|----|-------------|-------------|------------|
| Ba | 0.74404520  | 0.24404526  | 0.21463051 |
| Ba | 0.23133295  | 0.24910512  | 0.00205535 |
| Ba | -0.00234094 | 0.22666333  | 0.32934288 |
| Ba | 0.49610392  | 0.26599124  | 0.11046926 |
| Fe | 0.93638686  | 0.06756546  | 0.00191250 |
| Fe | 0.50000000  | 0.00000000  | 0.21463051 |
| Fe | 0.26296479  | 0.99352749  | 0.11344970 |
| Fe | 0.75032723  | 0.00304696  | 0.31572422 |
| Fe | 0.92832454  | 0.46658646  | 0.99282329 |
| Fe | 0.50000000  | 0.50000000  | 0.21463051 |
| Fe | 0.25344665  | 0.53025574  | 0.10590481 |
| Fe | 0.73265535  | 0.50173428  | 0.30344016 |
| Fe | 0.73938680  | 0.03626281  | 0.10608386 |
| Fe | 0.23771875  | 0.96280310  | 0.31672500 |
| Fe | 0.00000000  | 0.00000000  | 0.21463051 |
| Fe | 0.49315779  | 0.00417971  | 0.01682065 |
| Fe | 0.74918987  | 0.48674265  | 0.09663144 |
| Fe | 0.26127593  | 0.52736783  | 0.32032617 |
| Ce | 0.00000000  | 0.50000000  | 0.21463051 |
| Ce | 0.48261281  | 0.50068856  | 0.98259546 |
| O  | 0.85045536  | 0.01778313  | 0.95051141 |
| O  | 0.50000000  | 0.75208080  | 0.21463051 |
| O  | 0.24401821  | 0.75804474  | 0.10606157 |
| O  | 0.99685215  | 0.26937860  | 0.99003111 |
| O  | 0.50000000  | 0.24791920  | 0.21463051 |
| O  | 0.24460600  | 0.21584509  | 0.10409434 |
| O  | 0.74828911  | 0.71488504  | 0.09780405 |
| O  | 0.25834572  | 0.74562196  | 0.33385999 |
| O  | 0.00000000  | 0.77205044  | 0.21463051 |
| O  | 0.49289186  | 0.80581318  | 0.98895300 |
| O  | 0.73671265  | 0.25975730  | 0.11190611 |
| O  | 0.28556108  | 0.35389837  | 0.36528449 |
| O  | 0.00000000  | 0.22794956  | 0.21463051 |
| O  | 0.49325313  | 0.18581770  | 0.97977967 |
| O  | 0.07472385  | 0.98713332  | 0.01998322 |
| O  | 0.62167584  | 0.00174659  | 0.27087013 |
| O  | 0.37604040  | 0.00000000  | 0.16141950 |
| O  | 0.84971167  | -0.00018923 | 0.36707745 |
| O  | 0.14160915  | 0.49689585  | 0.05832218 |
| O  | 0.60621061  | 0.49761886  | 0.26996036 |

|   |            |             |            |
|---|------------|-------------|------------|
| O | 0.37634283 | 0.50000000  | 0.16154932 |
| O | 0.83331054 | 0.46168806  | 0.94339308 |
| O | 0.87365711 | 0.00000000  | 0.16039647 |
| O | 0.12172201 | 0.00796691  | 0.27090280 |
| O | 0.62337985 | 0.00037205  | 0.05419045 |
| O | 0.86397487 | 0.50000000  | 0.15624020 |
| O | 0.31815079 | 0.49323754  | 0.94811303 |
| O | 0.12935661 | 0.49138182  | 0.28393827 |
| O | 0.62763601 | 0.48947657  | 0.04773902 |
| O | 0.85516709 | 0.00752620  | 0.05615640 |
| O | 0.37144529 | 0.00307248  | 0.27812238 |
| O | 0.12634283 | 0.00000000  | 0.16039647 |
| O | 0.62725125 | 0.00552836  | 0.36890122 |
| O | 0.87291542 | 0.46172411  | 0.05524511 |
| O | 0.38007683 | 0.50211882  | 0.27639322 |
| O | 0.13602522 | 0.50000000  | 0.15624020 |
| O | 0.60025632 | 0.51456584  | 0.92444456 |
| O | 0.62733216 | 0.99331301  | 0.16134331 |
| O | 0.17913222 | 0.06013399  | 0.36995582 |
| O | 0.87374442 | -0.00155128 | 0.26908383 |
| O | 0.35567170 | 0.99201151  | 0.05107810 |
| O | 0.62013458 | 0.50072275  | 0.16711106 |
| O | 0.99160214 | 0.65766975  | 0.98988786 |
| O | 0.88308370 | 0.50456081  | 0.30197540 |
| O | 0.37033149 | 0.50871731  | 0.05664201 |

## S5: Orthorhombic BCF8515 Free Energy Equations

T is temperature in K

### S5.1.1: $\Delta G$ for rxn(I) from oxygen defect free surface

$$\Delta G = -6.24151 \times 10^{18} T (1.380000000 \times 10^{(-23)} \ln(0.01007824655 \exp(-6335.270153/T) T (1 - \exp(-5283.946913/T)) (1 - \exp(-4995.667899/T)) (1 - \exp(-996.9201116/T)) (1 - \exp(-747.3455797/T)) (1 - \exp(-384.3152022/T)) (1 - \exp(-254.5651583/T)) / ((1 - \exp(-6335.270153/T)) \exp(-5283.946913/T) \exp(-4995.667899/T) \exp(-996.9201116/T) \exp(-747.3455797/T) \exp(-384.3152022/T) \exp(-254.5651583/T))) + 1.380000000 \times 10^{(-23)} \ln(3.631578947 \times 10^{(-26)} T) + 2.070000000 \times 10^{(-23)} \ln(6.610384564 \times 10^{17} T) + 3.450000000 \times 10^{(-23)} + 3.574774920$$

### S5.1.2: $\Delta G$ for rxn(II) from oxygen defect free surface

$$\Delta G = -6.24151 \times 10^{18} T (1.380000000 \times 10^{(-23)} \ln(0.01007824655 \exp(-6335.270153/T) T (1 - \exp(-4937.378304/T)) (1 - \exp(-4192.097348/T)) (1 - \exp(-1353.720609/T)) (1 - \exp(-1122.314761/T)) (1 - \exp(-1051.805478/T)) (1 - \exp(-801.0065768/T)) / ((1 - \exp(-6335.270153/T)) \exp(-$$

$$4937.378304/T) \cdot \exp(-4192.097348/T) \cdot \exp(-1353.720609/T) \cdot \exp(-1122.314761/T) \cdot \exp(-1051.805478/T) \cdot \exp(-801.0065768/T)) + 1.380000000 \cdot 10^{(-23)} \cdot \ln(3.631578947 \cdot 10^{(-26)} \cdot T) + 2.070000000 \cdot 10^{(-23)} \cdot \ln(6.610384564 \cdot 10^{17} \cdot T) + 3.450000000 \cdot 10^{(-23)} + 1.333386264$$

### S5.1.3: $\Delta G$ for rxn(III) from oxygen defect free surface

$$\Delta G = -6.24151 \cdot 10^{18} \cdot T \cdot (1.380000000 \cdot 10^{(-23)} \cdot \ln(0.6526881536 \cdot \sqrt{\exp(-2274.585976/T) \cdot T} / (1 - \exp(-2274.585976/T))) \cdot (1 - \exp(-1454.603859/T)) \cdot (1 - \exp(-222.6772932/T)) \cdot (1 - \exp(-121.4200096/T)) / (\exp(-1454.603859/T) \cdot \exp(-222.6772932/T) \cdot \exp(-121.4200096/T))) + 6.900000000 \cdot 10^{(-24)} \cdot \ln(3.631578947 \cdot 10^{(-26)} \cdot T) + 1.035000000 \cdot 10^{(-23)} \cdot \ln(1.049368400 \cdot 10^{19} \cdot T) + 1.725000000 \cdot 10^{(-23)} + 11.99805467$$

### S5.2.1: $\Delta G$ for rxn(I) from 1 oxygen defect surface

$$\Delta G = -6.24151 \cdot 10^{18} \cdot T \cdot (1.380000000 \cdot 10^{(-23)} \cdot \ln(0.01007824655 \cdot \exp(-6335.270153/T) \cdot T \cdot (1 - \exp(-4937.378304/T)) \cdot (1 - \exp(-4192.097348/T)) \cdot (1 - \exp(-1353.720609/T)) \cdot (1 - \exp(-1122.314761/T)) \cdot (1 - \exp(-1051.805478/T)) \cdot (1 - \exp(-801.0065768/T)) / ((1 - \exp(-6335.270153/T)) \cdot \exp(-4937.378304/T) \cdot \exp(-4192.097348/T) \cdot \exp(-1353.720609/T) \cdot \exp(-1122.314761/T) \cdot \exp(-1051.805478/T) \cdot \exp(-801.0065768/T))) + 1.380000000 \cdot 10^{(-23)} \cdot \ln(3.631578947 \cdot 10^{(-26)} \cdot T) + 2.070000000 \cdot 10^{(-23)} \cdot \ln(6.610384564 \cdot 10^{17} \cdot T) + 3.450000000 \cdot 10^{(-23)} + 1.333386264$$

### S5.2.2: $\Delta G$ for rxn(II) from 1 oxygen defect surface

$$\Delta G = -6.24151 \cdot 10^{18} \cdot T \cdot (1.380000000 \cdot 10^{(-23)} \cdot \ln(0.008696458588 \cdot \exp(-5509.855101/T) \cdot \exp(-5346.461783/T) \cdot \exp(-2278.729414/T) \cdot T^{(3/2)} \cdot (1 - \exp(-4938.962783/T)) \cdot (1 - \exp(-4322.461497/T)) \cdot (1 - \exp(-1363.035420/T)) \cdot (1 - \exp(-1132.551451/T)) \cdot (1 - \exp(-1051.402157/T)) \cdot (1 - \exp(-800.3055652/T)) \cdot (1 - \exp(-653.2467768/T)) \cdot (1 - \exp(-216.4488532/T)) \cdot (1 - \exp(-193.2525716/T)) / ((1 - \exp(-5509.855101/T)) \cdot (1 - \exp(-5346.461783/T)) \cdot (1 - \exp(-2278.729414/T)) \cdot \exp(-4938.962783/T) \cdot \exp(-4322.461497/T) \cdot \exp(-1363.035420/T) \cdot \exp(-1132.551451/T) \cdot \exp(-1051.402157/T) \cdot \exp(-800.3055652/T) \cdot \exp(-653.2467768/T) \cdot \exp(-216.4488532/T) \cdot \exp(-193.2525716/T))) + 1.380000000 \cdot 10^{(-23)} \cdot \ln(3.631578947 \cdot 10^{(-26)} \cdot T) + 2.070000000 \cdot 10^{(-23)} \cdot \ln(6.568918916 \cdot 10^{18} \cdot T) + 3.450000000 \cdot 10^{(-23)} + 1.111094886$$

### S5.2.3: $\Delta G$ for rxn(III) from 1 oxygen defect surface

$$\Delta G = -6.24151 \cdot 10^{18} \cdot T \cdot (1.380000000 \cdot 10^{(-23)} \cdot \ln(0.6526881536 \cdot \sqrt{\exp(-2274.585976/T) \cdot T} / (1 - \exp(-2274.585976/T))) \cdot (1 - \exp(-1235.100804/T)) \cdot (1 - \exp(-310.9697035/T)) \cdot (1 - \exp(-247.8071184/T)) / (\exp(-1235.100804/T) \cdot \exp(-310.9697035/T) \cdot \exp(-247.8071184/T))) + 6.900000000 \cdot 10^{(-24)} \cdot \ln(3.631578947 \cdot 10^{(-26)} \cdot T) + 1.035000000 \cdot 10^{(-23)} \cdot \ln(1.049368400 \cdot 10^{19} \cdot T) + 1.725000000 \cdot 10^{(-23)} + 10.50302578$$

### S5.3.1: $\Delta G$ for rxn(I) from 2 oxygen defect surface

$$\Delta G = -6.24151 \cdot 10^{18} \cdot T \cdot (1.380000000 \cdot 10^{(-23)} \cdot \ln(0.01007824655 \cdot \exp(-6335.270153/T) \cdot T \cdot (1 - \exp(-6236.122319/T)) \cdot (1 - \exp(-4472.309928/T)) \cdot (1 - \exp(-1343.608757/T)) \cdot (1 - \exp(-1009.783194/T)) \cdot (1 -$$

$$\exp(-941.7562609/T)) * (1 - \exp(-370.0289700/T)) / ((1 - \exp(-6335.270153/T)) * \exp(-6236.122319/T) * \exp(-4472.309928/T) * \exp(-1343.608757/T) * \exp(-1009.783194/T) * \exp(-941.7562609/T) * \exp(-370.0289700/T))) + 1.380000000 * 10^{(-23)} * \ln(3.631578947 * 10^{(-26)} * T) + 2.070000000 * 10^{(-23)} * \ln(6.610384564 * 10^{17} * T) + 3.450000000 * 10^{(-23)} + 0.5755102884$$

### S.5.3.2: $\Delta G$ for rxn(II) from 2 oxygen defect surface

$$\Delta G = -6.24151 * 10^{18} * T * (1.380000000 * 10^{(-23)} * \ln(0.008696458588 * \exp(-5509.855101/T) * \exp(-5346.461783/T) * \exp(-2278.729414/T) * T^{(3/2)} * (1 - \exp(-5041.137623/T)) * (1 - \exp(-4543.371377/T)) * (1 - \exp(-1306.642399/T)) * (1 - \exp(-1034.923583/T)) * (1 - \exp(-980.7584333/T)) * (1 - \exp(-934.6021014/T)) * (1 - \exp(-428.7665394/T)) * (1 - \exp(-328.6731271/T)) * (1 - \exp(-266.0761528/T))) / ((1 - \exp(-5509.855101/T)) * (1 - \exp(-5346.461783/T)) * (1 - \exp(-2278.729414/T)) * \exp(-5041.137623/T) * \exp(-4543.371377/T) * \exp(-1306.642399/T) * \exp(-1034.923583/T) * \exp(-980.7584333/T) * \exp(-934.6021014/T) * \exp(-428.7665394/T) * \exp(-328.6731271/T) * \exp(-266.0761528/T))) + 1.380000000 * 10^{(-23)} * \ln(3.631578947 * 10^{(-26)} * T) + 2.070000000 * 10^{(-23)} * \ln(6.568918916 * 10^{18} * T) + 3.450000000 * 10^{(-23)} + 1.567143297$$

### S.5.3.3: $\Delta G$ for rxn(III) from 2 oxygen defect surface

$$\Delta G = -6.24151 * 10^{18} * T * (1.380000000 * 10^{(-23)} * \ln(0.6526881536 * \sqrt{\exp(-2274.585976/T) * T} / (1 - \exp(-2274.585976/T))) * (1 - \exp(-1303.694309/T)) * (1 - \exp(-353.2186159/T)) * (1 - \exp(-292.1057696/T)) / (\exp(-1303.694309/T) * \exp(-353.2186159/T) * \exp(-292.1057696/T))) + 6.900000000 * 10^{(-24)} * \ln(3.631578947 * 10^{(-26)} * T) + 1.035000000 * 10^{(-23)} * \ln(1.049368400 * 10^{19} * T) + 1.725000000 * 10^{(-23)} + 5.558620149$$

## S6: Cubic BCF8515 Free Energy Equations

T is temperature in K

### S6.1.1: $\Delta G$ for rxn(I) from oxygen defect free surface

$$\Delta G = -6.24151 * 10^{18} * T * (1.380000000 * 10^{(-23)} * \ln(0.01007824655 * \exp(-6335.270153/T) * T * (1 - \exp(-487.0398087/T)) * (1 - \exp(-488.4678078/T)) * (1 - \exp(-675.6321417/T)) * (1 - \exp(-677.2298719/T)) * (1 - \exp(-5165.883404/T)) * (1 - \exp(-5249.052333/T))) / ((1 - \exp(-6335.270153/T)) * \exp(-487.0398087/T) * \exp(-488.4678078/T) * \exp(-675.6321417/T) * \exp(-677.2298719/T) * \exp(-5165.883404/T) * \exp(-5249.052333/T))) + 1.380000000 * 10^{(-23)} * \ln(3.631578947 * 10^{(-26)} * T) + 2.070000000 * 10^{(-23)} * \ln(6.610384564 * 10^{17} * T) + 3.450000000 * 10^{(-23)} + 2.034207973$$

### S6.1.2: $\Delta G$ for rxn(II) from oxygen defect free surface

$$\Delta G = -6.24151 * 10^{18} * T * (1.380000000 * 10^{(-23)} * \ln(0.008696458588 * \exp(-5509.855101/T) * \exp(-5346.461783/T) * \exp(-2278.729414/T) * T^{(3/2)} * (1 - \exp(-102.8556380/T)) * (1 - \exp(-106.9295238/T)) * (1 - \exp(-383.2334837/T)) * (1 - \exp(-488.4366463/T)) * (1 - \exp(-491.2900036/T)) * (1 - \exp(-676.7502551/T)) * (1 - \exp(-680.3466367/T)) * (1 - \exp(-5166.231606/T)) * (1 - \exp(-5409.609867/T))) / ((1 - \exp(-5509.855101/T)) * (1 - \exp(-5346.461783/T)) * (1 - \exp(-2278.729414/T)) * \exp(-102.8556380/T) * \exp(-106.9295238/T) * \exp(-383.2334837/T) * \exp(-$$

$$488.4366463/T) \cdot \exp(-491.2900036/T) \cdot \exp(-676.7502551/T) \cdot \exp(-680.3466367/T) \cdot \exp(-5166.231606/T) \cdot \exp(-5409.609867/T)) + 1.380000000 \cdot 10^{(-23)} \cdot \ln(3.631578947 \cdot 10^{(-26)} \cdot T) + 2.070000000 \cdot 10^{(-23)} \cdot \ln(6.568918916 \cdot 10^{18} \cdot T) + 3.450000000 \cdot 10^{(-23)} + 1.479200421$$

#### **S6.1.1: $\Delta G$ for rxn(III) from oxygen defect free surface**

$$\Delta G = -6.24151 \cdot 10^{18} \cdot T \cdot (1.380000000 \cdot 10^{(-23)} \cdot \ln(0.6526881536 \cdot \sqrt{\exp(-2274.585976/T) \cdot T / (1 - \exp(-2274.585976/T))}) \cdot (1 - \exp(-1454.603859/T)) \cdot (1 - \exp(-222.6772932/T)) \cdot (1 - \exp(-121.4200096/T))) / (\exp(-1454.603859/T) \cdot \exp(-222.6772932/T) \cdot \exp(-121.4200096/T))) + 6.900000000 \cdot 10^{(-24)} \cdot \ln(3.631578947 \cdot 10^{(-26)} \cdot T) + 1.035000000 \cdot 10^{(-23)} \cdot \ln(1.049368400 \cdot 10^{19} \cdot T) + 1.725000000 \cdot 10^{(-23)} + 3.873044200$$

#### **S6.2.1: $\Delta G$ for rxn(I) from 1 oxygen defect surface**

$$\Delta G = -6.24151 \cdot 10^{18} \cdot T \cdot (1.380000000 \cdot 10^{(-23)} \cdot \ln(0.01007824655 \cdot \exp(-6335.270153/T) \cdot T \cdot (1 - \exp(-538.3626920/T)) \cdot (1 - \exp(-652.3645105/T)) \cdot (1 - \exp(-670.5889394/T)) \cdot (1 - \exp(-772.5057978/T)) \cdot (1 - \exp(-5098.441143/T)) \cdot (1 - \exp(-5128.849634/T))) / ((1 - \exp(-6335.270153/T)) \cdot \exp(-538.3626920/T) \cdot \exp(-652.3645105/T) \cdot \exp(-670.5889394/T) \cdot \exp(-772.5057978/T) \cdot \exp(-5098.441143/T) \cdot \exp(-5128.849634/T))) + 1.380000000 \cdot 10^{(-23)} \cdot \ln(3.631578947 \cdot 10^{(-26)} \cdot T) + 2.070000000 \cdot 10^{(-23)} \cdot \ln(6.610384564 \cdot 10^{17} \cdot T) + 3.450000000 \cdot 10^{(-23)} + 0.2681870741$$

#### **S6.2.2: $\Delta G$ for rxn(II) from 1 oxygen defect surface**

$$\Delta G = -6.24151 \cdot 10^{18} \cdot T \cdot (1.380000000 \cdot 10^{(-23)} \cdot \ln(0.008696458588 \cdot \exp(-5509.855101/T) \cdot \exp(-5346.461783/T) \cdot \exp(-2278.729414/T) \cdot T^{(3/2)} \cdot (1 - \exp(-213.4512604/T)) \cdot (1 - \exp(-233.5029768/T)) \cdot (1 - \exp(-336.2794870/T)) \cdot (1 - \exp(-564.0609128/T)) \cdot (1 - \exp(-648.8068286/T)) \cdot (1 - \exp(-668.6268751/T)) \cdot (1 - \exp(-785.0251449/T)) \cdot (1 - \exp(-5097.718717/T)) \cdot (1 - \exp(-5283.596455/T))) / ((1 - \exp(-5509.855101/T)) \cdot (1 - \exp(-5346.461783/T)) \cdot (1 - \exp(-2278.729414/T)) \cdot \exp(-213.4512604/T) \cdot \exp(-233.5029768/T) \cdot \exp(-336.2794870/T) \cdot \exp(-564.0609128/T) \cdot \exp(-648.8068286/T) \cdot \exp(-668.6268751/T) \cdot \exp(-785.0251449/T) \cdot \exp(-5097.718717/T) \cdot \exp(-5283.596455/T))) + 1.380000000 \cdot 10^{(-23)} \cdot \ln(3.631578947 \cdot 10^{(-26)} \cdot T) + 2.070000000 \cdot 10^{(-23)} \cdot \ln(6.568918916 \cdot 10^{18} \cdot T) + 3.450000000 \cdot 10^{(-23)} + 1.599230900$$

#### **S6.2.3: $\Delta G$ for rxn(III) from 1 oxygen defect surface**

$$\Delta G = -6.24151 \cdot 10^{18} \cdot T \cdot (1.380000000 \cdot 10^{(-23)} \cdot \ln(0.6526881536 \cdot \sqrt{\exp(-2274.585976/T) \cdot T / (1 - \exp(-2274.585976/T))}) \cdot (1 - \exp(-1235.100804/T)) \cdot (1 - \exp(-310.9697035/T)) \cdot (1 - \exp(-247.8071184/T))) / (\exp(-1235.100804/T) \cdot \exp(-310.9697035/T) \cdot \exp(-247.8071184/T))) + 6.900000000 \cdot 10^{(-24)} \cdot \ln(3.631578947 \cdot 10^{(-26)} \cdot T) + 1.035000000 \cdot 10^{(-23)} \cdot \ln(1.049368400 \cdot 10^{19} \cdot T) + 1.725000000 \cdot 10^{(-23)} + 3.135890662$$



## S7: Cubic BCF1585 Free Energy Equations

T is temperature in K

### S7.1.1: $\Delta G$ for rxn(I) from oxygen defect free surface

$$\Delta G = -6.24151 \cdot 10^{18} \cdot T \cdot (1.380000000 \cdot 10^{(-23)} \cdot \ln(0.01007824655 \cdot \exp(-6335.270153/T) \cdot T \cdot (1 - \exp(-5112.775246/T)) \cdot (1 - \exp(-5020.587420/T)) \cdot (1 - \exp(-1078.059803/T)) \cdot (1 - \exp(-1057.874510/T)) \cdot (1 - \exp(-818.3734188/T)) \cdot (1 - \exp(-717.6678217/T)) / ((1 - \exp(-6335.270153/T)) \cdot \exp(-5112.775246/T) \cdot \exp(-5020.587420/T) \cdot \exp(-1078.059803/T) \cdot \exp(-1057.874510/T) \cdot \exp(-818.3734188/T) \cdot \exp(-717.6678217/T))) + 1.380000000 \cdot 10^{(-23)} \cdot \ln(3.631578947 \cdot 10^{(-26)} \cdot T) + 2.070000000 \cdot 10^{(-23)} \cdot \ln(6.610384564 \cdot 10^{17} \cdot T) + 3.450000000 \cdot 10^{(-23)}) + 3.634855696$$

### S7.1.2: $\Delta G$ for rxn(II) from oxygen defect free surface

$$\Delta G = -6.24151 \cdot 10^{18} \cdot T \cdot (1.380000000 \cdot 10^{(-23)} \cdot \ln(0.008696458588 \cdot \exp(-5509.855101/T) \cdot \exp(-5346.461783/T) \cdot \exp(-2278.729414/T) \cdot T^{(3/2)} \cdot (1 - \exp(-5263.684797/T)) \cdot (1 - \exp(-5021.307638/T)) \cdot (1 - \exp(-1116.917932/T)) \cdot (1 - \exp(-1058.902020/T)) \cdot (1 - \exp(-855.6470696/T)) \cdot (1 - \exp(-726.1615855/T)) \cdot (1 - \exp(-537.1045203/T)) \cdot (1 - \exp(-432.2115793/T)) \cdot (1 - \exp(-307.6451800/T)) / ((1 - \exp(-5509.855101/T)) \cdot (1 - \exp(-5346.461783/T)) \cdot (1 - \exp(-2278.729414/T)) \cdot \exp(-5263.684797/T) \cdot \exp(-5021.307638/T) \cdot \exp(-1116.917932/T) \cdot \exp(-1058.902020/T) \cdot \exp(-855.6470696/T) \cdot \exp(-726.1615855/T) \cdot \exp(-537.1045203/T) \cdot \exp(-432.2115793/T) \cdot \exp(-307.6451800/T))) + 1.380000000 \cdot 10^{(-23)} \cdot \ln(3.631578947 \cdot 10^{(-26)} \cdot T) + 2.070000000 \cdot 10^{(-23)} \cdot \ln(6.568918916 \cdot 10^{18} \cdot T) + 3.450000000 \cdot 10^{(-23)}) + 2.163045223$$

### S7.1.3: $\Delta G$ for rxn(III) from oxygen defect free surface

$$\Delta G = -6.24151 \cdot 10^{18} \cdot T \cdot (1.380000000 \cdot 10^{(-23)} \cdot \ln(0.6526881536 \cdot \sqrt{\exp(-2274.585976/T) \cdot T} / (1 - \exp(-2274.585976/T))) \cdot (1 - \exp(-1352.078513/T)) \cdot (1 - \exp(-584.6484710/T)) \cdot (1 - \exp(-382.7047961/T)) / (\exp(-1352.078513/T) \cdot \exp(-584.6484710/T) \cdot \exp(-382.7047961/T))) + 6.900000000 \cdot 10^{(-24)} \cdot \ln(3.631578947 \cdot 10^{(-26)} \cdot T) + 1.035000000 \cdot 10^{(-23)} \cdot \ln(1.049368400 \cdot 10^{19} \cdot T) + 1.725000000 \cdot 10^{(-23)}) + 0.6836825224$$

### S7.2.1: $\Delta G$ for rxn(I) from 1 oxygen defect surface

$$\Delta G = -6.24151 \cdot 10^{18} \cdot T \cdot (1.380000000 \cdot 10^{(-23)} \cdot \ln(0.01007824655 \cdot \exp(-6335.270153/T) \cdot T \cdot (1 - \exp(-5235.020145/T)) \cdot (1 - \exp(-5134.285739/T)) \cdot (1 - \exp(-1063.007259/T)) \cdot (1 - \exp(-1054.273423/T)) \cdot (1 - \exp(-749.9047522/T)) \cdot (1 - \exp(-534.7037957/T)) / ((1 - \exp(-6335.270153/T)) \cdot \exp(-5235.020145/T) \cdot \exp(-5134.285739/T) \cdot \exp(-1063.007259/T) \cdot \exp(-1054.273423/T) \cdot \exp(-749.9047522/T) \cdot \exp(-534.7037957/T))) + 1.380000000 \cdot 10^{(-23)} \cdot \ln(3.631578947 \cdot 10^{(-26)} \cdot T) + 2.070000000 \cdot 10^{(-23)} \cdot \ln(6.610384564 \cdot 10^{17} \cdot T) + 3.450000000 \cdot 10^{(-23)}) + 4.079675630$$

### S7.2.2: $\Delta G$ for rxn(II) from 1 oxygen defect surface

$$\Delta G = -6.24151 \cdot 10^{18} \cdot T \cdot (1.380000000 \cdot 10^{(-23)} \cdot \ln(0.008696458588 \cdot \exp(-5509.855101/T) \cdot \exp(-5346.461783/T) \cdot \exp(-2278.729414/T) \cdot T^{(3/2)} \cdot (1 - \exp(-5287.548000/T)) \cdot (1 - \exp(-5234.395957/T)) \cdot (1 - \exp(-1105.418461/T)) \cdot (1 - \exp(-1056.414870/T)) \cdot (1 - \exp(-774.1712768/T)) \cdot (1 - \exp(-774.1712768/T))) + 1.380000000 \cdot 10^{(-23)} \cdot \ln(3.631578947 \cdot 10^{(-26)} \cdot T) + 2.070000000 \cdot 10^{(-23)} \cdot \ln(6.610384564 \cdot 10^{17} \cdot T) + 3.450000000 \cdot 10^{(-23)}) + 4.079675630$$

$$\exp(-535.6736884/T)) * (1 - \exp(-518.8974246/T)) * (1 - \exp(-429.9697826/T)) * (1 - \exp(-334.5438591/T)) / ((1 - \exp(-5509.855101/T)) * (1 - \exp(-5346.461783/T)) * (1 - \exp(-2278.729414/T)) * \exp(-5287.548000/T) * \exp(-5234.395957/T) * \exp(-1105.418461/T) * \exp(-1056.414870/T) * \exp(-774.1712768/T) * \exp(-535.6736884/T) * \exp(-518.8974246/T) * \exp(-429.9697826/T) * \exp(-334.5438591/T))) + 1.380000000 * 10^{(-23)} * \ln(3.631578947 * 10^{(-26)} * T) + 2.070000000 * 10^{(-23)} * \ln(6.568918916 * 10^{18} * T) + 3.450000000 * 10^{(-23)} + 1.636823514$$

### S7.2.3: $\Delta G$ for rxn(III) from 1 oxygen defect surface

$$\Delta G = -6.24151 * 10^{18} * T * (1.380000000 * 10^{(-23)} * \ln(0.6526881536 * \sqrt{\exp(-2274.585976/T) * T} / (1 - \exp(-2274.585976/T))) * (1 - \exp(-1355.405917/T)) * (1 - \exp(-546.6546029/T)) * (1 - \exp(-399.2501101/T)) / (\exp(-1355.405917/T) * \exp(-546.6546029/T) * \exp(-399.2501101/T))) + 6.900000000 * 10^{(-24)} * \ln(3.631578947 * 10^{(-26)} * T) + 1.035000000 * 10^{(-23)} * \ln(1.049368400 * 10^{19} * T) + 1.725000000 * 10^{(-23)} + 1.935105277$$

### S7.3.1: $\Delta G$ for rxn(I) from 2 oxygen defect surface

$$\Delta G = -6.24151 * 10^{18} * T * (1.380000000 * 10^{(-23)} * \ln(0.01007824655 * \exp(-6335.270153/T) * T * (1 - \exp(-5253.553739/T)) * (1 - \exp(-5220.327710/T)) * (1 - \exp(-1067.904738/T)) * (1 - \exp(-1025.805630/T)) * (1 - \exp(-672.0156420/T)) * (1 - \exp(-544.9596913/T)) / ((1 - \exp(-6335.270153/T)) * \exp(-5253.553739/T) * \exp(-5220.327710/T) * \exp(-1067.904738/T) * \exp(-1025.805630/T) * \exp(-672.0156420/T) * \exp(-544.9596913/T))) + 1.380000000 * 10^{(-23)} * \ln(3.631578947 * 10^{(-26)} * T) + 2.070000000 * 10^{(-23)} * \ln(6.610384564 * 10^{17} * T) + 3.450000000 * 10^{(-23)} + 2.302024926$$

### S7.3.2: $\Delta G$ for rxn(II) from 2 oxygen defect surface

$$\Delta G = 6.24151 * 10^{18} * T * (1.380000000 * 10^{(-23)} * \ln(0.008696458588 * \exp(-5509.855101/T) * \exp(-5346.461783/T) * \exp(-2278.729414/T) * T^{(3/2)} * (1 - \exp(-5380.408029/T)) * (1 - \exp(-5253.265652/T)) * (1 - \exp(-1115.904826/T)) * (1 - \exp(-1025.455125/T)) * (1 - \exp(-700.9683812/T)) * (1 - \exp(-569.5527145/T)) * (1 - \exp(-544.9068754/T)) * (1 - \exp(-392.7811175/T)) * (1 - \exp(-269.3867520/T)) / ((1 - \exp(-5509.855101/T)) * (1 - \exp(-5346.461783/T)) * (1 - \exp(-2278.729414/T)) * \exp(-5380.408029/T) * \exp(-5253.265652/T) * \exp(-1115.904826/T) * \exp(-1025.455125/T) * \exp(-700.9683812/T) * \exp(-569.5527145/T) * \exp(-544.9068754/T) * \exp(-392.7811175/T) * \exp(-269.3867520/T))) + 1.380000000 * 10^{(-23)} * \ln(3.631578947 * 10^{(-26)} * T) + 2.070000000 * 10^{(-23)} * \ln(6.568918916 * 10^{18} * T) + 3.450000000 * 10^{(-23)} + 3.075035939$$

### S7.3.3: $\Delta G$ for rxn(III) from 2 oxygen defect surface

$$\Delta G = -6.24151 * 10^{18} * T * (1.380000000 * 10^{(-23)} * \ln(0.6526881536 * \sqrt{\exp(-2274.585976/T) * T} / (1 - \exp(-2274.585976/T))) * (1 - \exp(-1373.843483/T)) * (1 - \exp(-603.9022826/T)) * (1 - \exp(-315.7980409/T)) / (\exp(-1373.843483/T) * \exp(-603.9022826/T) * \exp(-315.7980409/T))) + 6.900000000 * 10^{(-24)} * \ln(3.631578947 * 10^{(-26)} * T) + 1.035000000 * 10^{(-23)} * \ln(1.049368400 * 10^{19} * T) + 1.725000000 * 10^{(-23)} + 3.703462374$$
